# Supplementary material
Source: publisher figshare collection journal article supplement (https://gsajournals.figshare.com/ndownloader/files/14566271)
Supplement: Supplementary file 1 [file 14566271]

Gene,Hiten's Annotation,CH Annotation,Wild Reads,KO Reads,log2 ratio,Z,100 reads in unselected
CNAG_06333,"RFC3 Subunit of heteropentameric Replication factor C (RF-C), which is a DNA binding protein and ATPase that acts as a clamp loader of the proliferating cell nuclear antigen (PCNA) processivity factor for DNA polymerases delta and epsilon",,184.0,69386.0,8.558795023,4.319569742,True
CNAG_06643,Not a dicer!,,494.0,128629.0,8.024489184,4.17903671,True
CNAG_00681,"YCG1 Subunit of the condensin complex; required for establishment and maintenance of chromosome condensation, chromosome segregation and chromatin binding of the condensin complex; required for clustering of tRNA genes at the nucleolus",,919.0,189169.0,7.68539511,4.089848244,True
CNAG_04792,"PSD2 Phosphatidylserine decarboxylase of the Golgi and vacuolar membranes, converts phosphatidylserine to phosphatidylethanolamine",,622.0,105309.0,7.403498442999999,4.01570383,True
CNAG_03748,"GCN1 Positive regulator of the Gcn2p kinase activity, forms a complex with Gcn20p; proposed to stimulate Gcn2p activation by an uncharged tRNA",,1107.0,156289.0,7.141417209,3.946771268,True
CNAG_01156,CAP2p,CAP2(Capsular related protein),417.0,56572.0,7.083896982000001,3.9316423069999997,True
CNAG_01423,QIP1,,844.0,108712.0,7.009052484,3.91195672,True
CNAG_05524,PCL6 Pho85p cyclin of the Pho80p subfamily; forms the major Glc8p kinase together with Pcl7p and Pho85p; involved in the control of glycogen storage by Pho85p; stabilized by Elongin C binding,,165.0,19703.0,6.899805477999999,3.8832225910000004,True
CNAG_04805,CWC27 Component of a complex containing Cef1p; putatively involved in pre-mRNA splicing; has similarity to S. pombe Cwf27p; protein abundance increases in response to DNA replication stress,,2691.0,264480.0,6.618872429,3.8093316269999997,True
CNAG_03466,RDP1,RDP1(Putative RNA-directed RNA polymerase; involved in regulating gene expression through RNA interference (RNAi)),7627.0,399652.0,5.711484799,3.570670686,True
CNAG_00520,GWO1,,3851.0,177450.0,5.526035641,3.52189388,True
CNAG_05266,membrane protein    PF01184.11 Grp1_Fun34_YaaH,,838.0,35817.0,5.417550449,3.493360123,True
CNAG_04954,conserved hypothetical protein,EDC4,7189.0,197828.0,4.782311721,3.326279739,True
CNAG_04955,oxidoreductase    PF02826.11 2-Hacid_dh_C,,7189.0,197828.0,4.782311721,3.326279739,True
CNAG_03467,conserved hypothetical protein  [next to RDP1],,4860.0,130067.0,4.74215485,3.315717686,True
CNAG_04070,YME2 Integral inner mitochondrial membrane protein with a role in maintaining mitochondrial nucleoid structure and number; mutants exhibit an increased rate of mitochondrial DNA escape; shows some sequence similarity to exonucleases,,1108.0,28730.0,4.696528206,3.303716974,True
CNAG_01157,Rel-Spo Domain protein  PHYRE (100%) nucleotidyltransferase (e.g. TUTase),,2831.0,70353.0,4.63522829,3.28759388,True
CNAG_00932,"YMR090W Putative protein of unknown function with similarity to DTDP-glucose 4,6-dehydratases; GFP-fusion protein localizes to the cytoplasm; up-regulated in response to the fungicide mancozeb; not essential for viability",,285.0,6163.0,4.4345989669999994,3.234824389,True
CNAG_05723,alcohol dehydrogenase    PF00107.18 ADH_zinc_N PF08240.4 ADH_N,,4049.0,84650.0,4.38587252,3.222008367,True
CNAG_03627,cyclophilin A    PF00160.13 Pro_isomerase,"CPA1(Cyclophilin A, targeted by the immunosuppressant cyclosporin A, mutants are inviable at 39 degrees, attenuated for virulence)CPA1(Cyclophilin A; one of two cyclophilins in Cryptococcus)",32712.0,599930.0,4.196902303,3.1723054530000003,True
CNAG_05520,conserved hypothetical protein  TMEM171 domain,,9822.0,159734.0,4.023510796,3.126700048,True
CNAG_03090,conserved hypothetical protein    PF07690.8 MFS_1,,4592.0,74307.0,4.0163035769999995,3.1248044060000004,True
CNAG_04069,"PRP31 Splicing factor, component of the U4/U6-U5 snRNP complex",,1993.0,28730.0,3.849544378,3.08094343,True
CNAG_02121,conserved hypothetical protein,,3217.0,42686.0,3.729975136,3.049494348,True
CNAG_04324,Atg22B-1p,,102.0,1147.0,3.4912243339999995,2.9866981519999998,True
CNAG_04609,AGO1,AGO1(Argonaute protein; involved in gene silencing by RNA interference (RNAi); H99 contains a single AGO1 gene whereas JEC21 contains 2 Argonaute genes AGO1 and AGO2),3620.0,38225.0,3.4004548989999996,2.962823991,True
CNAG_02528,conserved hypothetical protein,,520.0,5337.0,3.359445483,2.952037701,True
CNAG_03449,RAD14 Protein that recognizes and binds damaged DNA during nucleotide excision repair; subunit of Nucleotide Excision Repair Factor 1 (NEF1); contains zinc finger motif; homolog of human XPA protein,,234.0,1477.0,2.658089391,2.76756714,True
CNAG_05307,CTNNBL1-like protein.  Interacts with PRP31 and the NTC in humans DUF1716 domain-containing protein    PF00514.15 Arm PF08216.3 DUF1716,,399.0,2307.0,2.531557352,2.7342867039999996,True
CNAG_02430,ABC transporter ABCC.6    PF00005.19 ABC_tran PF00664.15 ABC_membrane,,1215.0,6141.0,2.337517289,2.68325032,True
CNAG_04791,conserved hypothetical protein,,11224.0,56717.0,2.33719431,2.68316537,True
CNAG_03299,"SEC26 Essential beta-coat protein of the COPI coatomer, involved in ER-to-Golgi protein trafficking and maintenance of normal ER morphology; shares 43% sequence identity with mammalian beta-coat protein (beta-COP)",?(Putative coatomer beta subunit),1609.0,5450.0,1.760091904,2.531375992,True
CNAG_03995,predicted protein    PF04930.7 FUN14,,832.0,2755.0,1.727396885,2.522776554,True
CNAG_05974,predicted protein,,423.0,1340.0,1.663503432,2.505971308,True
CNAG_05995,conserved hypothetical protein    PF01426.10 BAH,,289.0,894.0,1.629205339,2.49695023,True
CNAG_02009,extensin,,22470.0,62424.0,1.474100681,2.456154628,True
CNAG_07695,gamma-aminobutyric acid transporter,,176.0,421.0,1.258244804,2.399380252,True
CNAG_04651,ERV29 Protein localized to COPII-coated vesicles; involved in vesicle formation and incorporation of specific secretory cargo; protein abundance increases in response to DNA replication stress,,25827.0,60409.0,1.225883431,2.390868569,True
CNAG_04652,YNL134C Putative protein of unknown function; has similarity to dehydrogenases from other model organisms; green fluorescent protein (GFP)-fusion protein localizes to both the cytoplasm and nucleus; protein abundance increases in response to DNA replication stress,,25827.0,60409.0,1.225883431,2.390868569,True
CNAG_04500,conserved hypothetical protein,,32592.0,72240.0,1.148280007,2.37045733,True
CNAG_04501,TRP3 Indole-3-glycerol-phosphate synthase; forms bifunctional hetero-oligomeric anthranilate synthase:indole-3-glycerol phosphate synthase enzyme complex with Trp2p,,32593.0,72240.0,1.1482357429999999,2.3704456869999997,True
CNAG_07658,hypothetical protein,,600.0,1298.0,1.113255978,2.361245315,True
CNAG_03996,"GDA1 Guanosine diphosphatase located in the Golgi, involved in the transport of GDP-mannose into the Golgi lumen by converting GDP to GMP after mannose is transferred its substrate",,1300.0,2756.0,1.084064265,2.353567316,True
CNAG_02317,arginine N-methyltransferase 3    PF08241.4 Methyltransf_11 PF08242.4 Methyltransf_12,,171.0,362.0,1.0819933720000001,2.35302263,True
CNAG_01960,efflux protein EncT    PF07690.8 MFS_1,,464.0,914.0,0.97806936,2.325688554,True
CNAG_03894,PDR802(V) Binuclear cluster DNA-binding regulator,PDR802(Zn2-Cys6 zinc-finger transcription factor; mutant shows decreased lung infectivity in competitive STM infection; Gat201-regulated),3077.0,5161.0,0.746126187,2.2646829,True
CNAG_05262,conserved hypothetical protein    PF00249.23 Myb_DNA-binding,,359.0,497.0,0.46926200799999995,2.19186213,True
CNAG_01602,IQ calmodulin-binding domain-containing protein    PF00612.19 IQ,,542.0,737.0,0.44337176799999994,2.185052483,True
CNAG_02314,conserved hypothetical protein,,9968.0,13539.0,0.441745211,2.184624667,True
CNAG_07713,predicted protein,,139439.0,183301.0,0.394580528,2.17221942,True
CNAG_04816,conserved hypothetical protein    PF00240.15 ubiquitin ubiquitin-like protein,,1612.0,1946.0,0.27165996600000003,2.139888874,True
CNAG_04817,BolA domain,,1612.0,1946.0,0.27165996600000003,2.139888874,True
CNAG_04860,conserved hypothetical protein,,587.0,694.0,0.24157515899999998,2.1319759730000003,True
CNAG_01052,conserved hypothetical protein,,690.0,810.0,0.23132554600000002,2.129280122,True
CNAG_03713,efflux protein EncT    PF07690.8 MFS_1,,3385.0,3883.0,0.198015873,2.120519017,True
CNAG_05742,conserved hypothetical protein    PF02163.14 Peptidase_M50,"Stp1(Gene implicated in the hypoxic response, some melanization defect)STP1(Putative site-2 protease)",26463.0,29223.0,0.143127668,2.106082331,True
CNAG_04702,conserved hypothetical protein    PF09497.2 Med12,,1473.0,1572.0,0.093843787,2.0931196930000002,True
CNAG_06343,SOH1 Subunit of the RNA polymerase II mediator complex; associates with core polymerase subunits to form the RNA polymerase II holoenzyme; involved in telomere maintenance; conserved with other metazoan MED31 subunits,,7121.0,7548.0,0.08401457,2.090534414,True
CNAG_01942,hypothetical protein,,738.0,745.0,0.013619609,2.0720191430000003,True
CNAG_04380,peptidase,?(Aspartic protease found secreted/bound to cell wall),646.0,648.0,0.004459648,2.069609892,True
CNAG_01576,IGO1 Protein required for initiation of G0 program; prevents degradation of nutrient-regulated mRNAs via the 5'-3' mRNA decay pathway; phosphorylated by Rim15p; GFP protein localizes to the cytoplasm and nucleus; similar to Igo2p,,343.0,315.0,-0.122856748,2.036123155,True
CNAG_05767,REG1 Regulatory subunit of type 1 protein phosphatase Glc7p; involved in negative regulation of glucose-repressible genes; involved in regulation of the nucleocytoplasmic shuttling of Hxk2p,,1346.0,1232.0,-0.12767615400000001,2.034855555,True
CNAG_00302,conserved hypothetical protein,,46466.0,40609.0,-0.194375955,2.017312185,True
CNAG_05724,conserved hypothetical protein,,5107.0,4251.0,-0.26467379999999996,1.998822457,True
CNAG_01442,NFS1 Cysteine desulfurase involved in iron-sulfur cluster (Fe/S) biogenesis and in thio-modification of mitochondrial and cytoplasmic tRNAs; essential protein located predominantly in mitochondria,,1463.0,1203.0,-0.282293127,1.994188225,True
CNAG_07927,CMC4 Protein that localizes to the mitochondrial intermembrane space via the Mia40p-Erv1p system; contains twin cysteine-x(9)-cysteine motifs,,4233.0,3338.0,-0.342696534,1.978300931,True
CNAG_03561,conserved hypothetical protein    PF00172.10 Zn_clus PF04082.10 Fungal_trans,,4200.0,3277.0,-0.358013655,1.9742722240000001,True
CNAG_06762,GAT204(V) GATA family transcription factor,GAT204(GAT201 dependent transcription factor; capsule-independent antiphagocytic protein),2270.0,1700.0,-0.417157551,1.958716207,True
CNAG_04197,"YAK1 Serine-threonine protein kinase; component of a glucose-sensing system that inhibits growth in response to glucose availability; upon nutrient deprivation Yak1p phosphorylates Pop2p to regulate mRNA deadenylation, the co-repressor Crf1p to inhibit transcription of ribosomal genes, and the stress-responsive transcription factors Hsf1p and Msn2p; nuclear localization negatively regulated by the Ras/PKA signaling pathway in the presence of glucose",,947.0,625.0,-0.599508236,1.91075436,True
CNAG_00887,conserved hypothetical protein,,17063.0,11224.0,-0.6042844079999999,1.909498132,True
CNAG_00888,"CNB1 Calcineurin B; the regulatory subunit of calcineurin, a Ca++/calmodulin-regulated type 2B protein phosphatase which regulates Crz1p (a stress-response transcription factor), the other calcineurin subunit is encoded by CNA1 and/or CMP1; protein abundance increases in response to DNA replication stress","Cnb1(Calcineurin B regulatory subunit, required for growth at elevated temperature and virulence in a mouse model)CNB1(Calcineurin B; regulatory subunit of calcineurin)",17063.0,11224.0,-0.6042844079999999,1.909498132,True
CNAG_07489,conserved hypothetical protein,,1022.0,663.0,-0.624314421,1.904229842,True
CNAG_01229,L-mandelate dehydrogenase    PF00173.20 Cyt-b5 PF01070.10 FMN_dh,,1007.0,615.0,-0.711405368,1.8813231959999999,True
CNAG_05293,"GLG1 Glycogenin glucosyltransferase; self-glucosylating initiator of glycogen synthesis, also glucosylates n-dodecyl-beta-D-maltoside; similar to mammalian glycogenin; GLG1 has a paralog, GLG2, that arose from the whole genome duplication",,397.0,235.0,-0.756478251,1.8694681340000001,True
CNAG_06681,conserved hypothetical protein    PF00564.16 PB1 PF00569.9 ZZ PF03107.8 C1_2 PF07649.4 C1_3 PF07754.3 DUF1610,,8915.0,5262.0,-0.7606235490000001,1.868377838,True
CNAG_02269,"ATG18 Phosphoinositide binding protein required for vesicle formation in autophagy and the cytoplasm-to-vacuole targeting (Cvt) pathway; binds both phosphatidylinositol (3,5)-bisphosphate and phosphatidylinositol 3-phosphate; WD-40 repeat protein",,1284.0,753.0,-0.769923432,1.865931784,True
CNAG_06751,conserved hypothetical protein    PF00010.18 HLH,,1789.0,1032.0,-0.793710417,1.859675336,True
CNAG_02523,conserved hypothetical protein,,12844.0,7292.0,-0.816708104,1.8536264880000002,True
CNAG_07889,predicted protein,,255.0,140.0,-0.86507042,1.8409062390000002,True
CNAG_02402,WDR7 protein    PF00400.24 WD40,,3649.0,1969.0,-0.89003804,1.83433926,True
CNAG_05595,conserved hypothetical protein    PF01344.17 Kelch_1,?(Protein found secreted/bound to cell wall),858.0,459.0,-0.902483494,1.831065859,True
CNAG_00596,"CRR1 Putative glycoside hydrolase of the spore wall envelope; required for normal spore wall assembly, possibly for cross-linking between the glucan and chitosan layers; expressed during sporulation",?(Putative secreted protein controlled by Znf2),2725.0,1453.0,-0.907221527,1.8298196619999998,True
CNAG_02994,conserved hypothetical protein,,375.0,191.0,-0.973317957,1.81243499,True
CNAG_04763,"PMT3 Protein O-mannosyltransferase; transfers mannose residues from dolichyl phosphate-D-mannose to protein serine/threonine residues; acts in a complex with Pmt5p, can instead interact with Pmt1p in some conditions; antifungal drug target; PMT3 has a paralog, PMT2, that arose from the whole genome duplication",PMT2(Dolichyl-phosphate-mannose-protein mannosyltransferase),440.0,210.0,-1.067114196,1.78776472,True
CNAG_05121,Contains 5 PPR Repeats (SMART),,6458.0,3066.0,-1.074729744,1.7857616790000002,True
CNAG_07734,predicted protein,,1062.0,486.0,-1.127755547,1.771814842,True
CNAG_03465,laccase    PF00394.14 Cu-oxidase PF07731.6 Cu-oxidase_2 PF07732.7 Cu-oxidase_3,"Lac1(Mutants cannot make melanin, much less virulent in mice)LAC1(Laccase 1; melanin synthesis)",1074.0,486.0,-1.143965774,1.76755123,True
CNAG_01681,FCY2201 putative purine-cytosine permease,FCY2(Cytosine permease; mutation of either FCY1 or FCY2 is sufficient to confer resistance to 5-fluorocytosine (5-FC)),8492.0,3568.0,-1.250988756,1.739402064,True
CNAG_07533,conserved hypothetical protein,,2215.0,924.0,-1.261341942,1.73667897,True
CNAG_00903,conserved hypothetical protein,,690.0,283.0,-1.2857943090000001,1.7302475130000001,True
CNAG_06493,CNN2220 unknown,,1508.0,608.0,-1.3104931999999998,1.723751215,True
CNAG_03483,GET1 Subunit of the GET complex; involved in insertion of proteins into the ER membrane; required for the retrieval of HDEL proteins from the Golgi to the ER in an ERD2 dependent fashion and for normal mitochondrial morphology and inheritance,,2829.0,1118.0,-1.339371989,1.716155521,True
CNAG_04876,"endo-1,3(4)-beta-glucanase",,3235.0,1270.0,-1.348937215,1.713639676,True
CNAG_02129,conserved hypothetical protein,,2499.0,981.0,-1.34902586,1.713616361,True
CNAG_00556,YCK2(VM) Casein kinase homolog involved in endocytosis,CCK1(Casein kinase I; regulates cell integrity via Mpk1 pathway and cell adaptation to stresses via Hog1 pathway; required for virulence in mice; 1 of 2 casein kinase I genes; mutant shows decreased lung infectivity in competitive STM infection),1284.0,502.0,-1.354885933,1.712075046,True
CNAG_01238,"ARG7 Mitochondrial ornithine acetyltransferase, catalyzes the fifth step in arginine biosynthesis; also possesses acetylglutamate synthase activity, regenerates acetylglutamate while forming ornithine",,620.0,241.0,-1.3632350690000001,1.709879057,True
CNAG_04768,CNBJ1500-A Gal4-like DNA binding domain,,1826.0,706.0,-1.3709466769999998,1.707850752,True
CNAG_07933,hypothetical protein,,1397.0,518.0,-1.4313080180000002,1.691974522,True
CNAG_06311,cytoplasmic protein    PF09335.3 SNARE_assoc,,1399.0,518.0,-1.433371959,1.691431664,True
CNAG_06764,short-chain dehydrogenase    PF00106.17 adh_short,,136.0,50.0,-1.4436066509999999,1.688739737,True
CNAG_02398,conserved hypothetical protein,,70149.0,25720.0,-1.447531895,1.68770732,True
CNAG_05424,conserved hypothetical protein,,1796.0,653.0,-1.4596324530000002,1.684524634,True
CNAG_02046,poly(A)-binding protein binding protein    PF06741.5 LsmAD PF07145.7 PAM2,,937.0,340.0,-1.462514302,1.68376665,True
CNAG_07827,hypothetical protein,,6146.0,2187.0,-1.490694547,1.676354687,True
CNAG_06320,conserved hypothetical protein    PF09463.2 Opy2,,2072.0,720.0,-1.5249551909999999,1.6673434580000002,True
CNAG_04518,conserved hypothetical protein    PF00096.18 zf-C2H2 PF08274.4 PhnA_Zn_Ribbon,,13563.0,4557.0,-1.5735200480000002,1.654569938,True
CNAG_04804,SRE1(V),"Sre1(Gene required for hypoxic response, virulence defect seen, some melanization defect)SRE1(SREBP homolog; regulator of oxygen sensing and sterol homeostasis; required for virulence)",2272.0,756.0,-1.587504695,1.6508916980000001,True
CNAG_07020,conserved hypothetical protein    PF00043.17 GST_C,,412.0,135.0,-1.60968493,1.645057856,True
CNAG_05920,tRNA specific adenosine deaminase    PF00383.14 dCMP_cyt_deam_1,,3323.0,1083.0,-1.61745305,1.643014687,True
CNAG_06383,IRC21 Putative protein of unknown function; may be involved in resistance to carboplatin and cisplatin; null mutant displays increase in spontaneous Rad52p foci; contains a lipid-binding domain and binds cardiolipin in a large-scale study,,2265.0,732.0,-1.629595497,1.6398209830000001,True
CNAG_07832,predicted protein,,1963.0,631.0,-1.637348262,1.637781851,True
CNAG_03992,GTP-binding protein 1    PF00009.19 GTP_EFTU PF03143.9 GTP_EFTU_D3 PF03144.17 GTP_EFTU_D2,,659.0,211.0,-1.643035466,1.636286004,True
CNAG_04841,transcriptional regulatory protein    PF00172.10 Zn_clus PF04082.10 Fungal_trans,,660.0,207.0,-1.6728352569999998,1.6284480680000002,True
CNAG_03160,PSO2 Nuclease required for a post-incision step in the repair of DNA single and double-strand breaks that result from interstrand crosslinks produced by a variety of mono- and bi-functional psoralen derivatives; induced by UV-irradiation,,1636.0,465.0,-1.8148701269999998,1.59109008,True
CNAG_01184,YNL011C Putative protein of unknown function; YNL011C is not an essential gene,,1844.0,524.0,-1.815199939,1.5910033330000002,True
CNAG_03664,high-affinity nickel-transporter    PF03824.8 NicO,,728.0,197.0,-1.885742821,1.572449156,True
CNAG_05300,mitochondrial carrier protein    PF00153.19 Mito_carr,,4074.0,1093.0,-1.898152579,1.569185144,True
CNAG_02828,conserved hypothetical protein,,3096.0,814.0,-1.9273047719999998,1.561517539,True
CNAG_00371,enoyl-CoA hydratase    PF00378.12 ECH,,4198.0,1046.0,-2.004819315,1.5411296769999998,True
CNAG_05120,"NPT1 Nicotinate phosphoribosyltransferase, acts in the salvage pathway of NAD+ biosynthesis; required for silencing at rDNA and telomeres and has a role in silencing at mating-type loci; localized to the nucleus",,3111.0,713.0,-2.125404413,1.509413405,True
CNAG_07411,JHD2 JmjC domain family histone demethylase specific for H3-K4 (histone H3 Lys4); removes methyl groups specifically added by Set1p methyltransferase; protein levels regulated by Not4p (E3 ubiquitin ligase) polyubiquitin-mediated degradation,RUM1(PHD transcription factor; encoded on MAT locus),7712.0,1642.0,-2.231650924,1.481468465,True
CNAG_06639,conserved hypothetical protein    PF00097.17 zf-C3HC4,,15594.0,3209.0,-2.280795345,1.468542508,True
CNAG_04783,monosaccharide transporter    PF00083.16 Sugar_tr PF07690.8 MFS_1,,19272.0,3910.0,-2.301265786,1.463158376,True
CNAG_06668,mitochondrial protein,,3520.0,694.0,-2.342567861,1.452295111,True
CNAG_00622,"ARG8 Acetylornithine aminotransferase, catalyzes the fourth step in the biosynthesis of the arginine precursor ornithine",,1600.0,284.0,-2.49410907,1.412436768,True
CNAG_04734,"ORT1 Ornithine transporter of the mitochondrial inner membrane, exports ornithine from mitochondria as part of arginine biosynthesis; human ortholog is associated with hyperammonaemia-hyperornithinaemia-homocitrullinuria (HHH) syndrome",,4318.0,736.0,-2.552585572,1.3970562880000001,True
CNAG_07677,conserved hypothetical protein    PF03732.9 Retrotrans_gag,,4035.0,674.0,-2.5817481769999997,1.389385945,True
CNAG_07676,"DBP2 Essential ATP-dependent RNA helicase of the DEAD-box protein family, involved in nonsense-mediated mRNA decay and rRNA processing",,4037.0,674.0,-2.58246309,1.389197908,True
CNAG_01165,"LCB4 Sphingoid long-chain base kinase, responsible for synthesis of long-chain base phosphates, which function as signaling molecules, regulates synthesis of ceramide from exogenous long-chain bases, localizes to the Golgi and late endosomes",,5097.0,846.0,-2.590918785,1.3869738930000002,True
CNAG_07559,"YMR099C Glucose-6-phosphate 1-epimerase (hexose-6-phosphate mutarotase), likely involved in carbohydrate metabolism; GFP-fusion protein localizes to both the nucleus and cytoplasm and is induced in response to the DNA-damaging agent MMS",,729.0,118.0,-2.627131955,1.377449111,True
CNAG_06036,lolT-1    PF06094.4 AIG2,,22997.0,3621.0,-2.6669855890000003,1.366966815,True
CNAG_07513,conserved hypothetical protein,,931.0,146.0,-2.672812799,1.365434143,True
CNAG_04703,DNA clamp loader    PF09079.3 Cdc6_C,,606.0,95.0,-2.673318375,1.365301167,True
CNAG_03756,conserved hypothetical protein,,5194.0,795.0,-2.707819249,1.356226753,True
CNAG_04681,conserved hypothetical protein,,3052.0,432.0,-2.820651745,1.326549569,True
CNAG_05913,"IMA2 Alpha-glucosidase with specificity for isomaltase, methyl-alpha-glucoside, and palatinose; member of IMA isomaltase family; not required for isomaltose utilization, but Ima2p overexpression allows the ima1 null mutant to grow on isomaltose",,2667.0,376.0,-2.826413258,1.325034176,True
CNAG_05325,conserved hypothetical protein,,5002.0,686.0,-2.866224576,1.31456301,True
CNAG_01277,conserved hypothetical protein,,4697.0,622.0,-2.916753108,1.301273004,True
CNAG_05892,"YKR043C Sedoheptulose bisphosphatase involved in riboneogenesis; dephosphorylates sedoheptulose 1,7-bisphosphate, which is converted via the nonoxidative pentose phosphate pathway to ribose-5-phosphate; facilitates the conversion of glycolytic intermediates to pentose phosphate units; also has fructose 1,6-bisphosphatase activity but this is probably not biologically relevant, since deletion does not affect FBP levels; GFP-fusion protein localizes to the cytoplasm and nucleus",,6039.0,778.0,-2.956467613,1.290827302,True
CNAG_07807,histone H4    PF00125.16 Histone PF00808.15 CBFD_NFYB_HMF,,1901.0,238.0,-2.997725053,1.279975777,True
CNAG_00150,peptidase    PF00082.14 Peptidase_S8 PF02225.14 PA,?(Serine protease found secreted/bound to cell wall),17958.0,2133.0,-3.0736708139999998,1.260000536,True
CNAG_02026,conserved hypothetical protein,,18718.0,2136.0,-3.13144274,1.244805373,True
CNAG_01239,chitin deacetylase    PF01522.13 Polysacc_deac_1,"Cda3(Chitin deacetylase found secreted/bound to cell wall, gpi anchor)CDA3(Chitin deactylase)",3806.0,417.0,-3.190156273,1.22936255,True
CNAG_02348,conserved hypothetical protein    PF04430.6 DUF498,,5028.0,542.0,-3.213619893,1.223191152,True
CNAG_01339,YOL098C Putative metalloprotease,,24148.0,2394.0,-3.334408649,1.191421314,True
CNAG_00632,conserved hypothetical protein    PF03208.11 PRA1,,3600.0,348.0,-3.370837695,1.181839753,True
CNAG_06347,conserved hypothetical protein,BLP2(PR4/Barwin domain protein),38850.0,3737.0,-3.37796213,1.179965885,True
CNAG_04503,conserved hypothetical protein,,3465.0,332.0,-3.383600206,1.178482959,True
CNAG_06200,CNM1860 PAS domain-containing protein,,4091.0,384.0,-3.4132753210000004,1.170677815,True
CNAG_04240,conserved hypothetical protein,,7301.0,669.0,-3.4480159639999997,1.161540337,True
CNAG_04241,cytoplasmic protein,,7302.0,669.0,-3.448213553,1.1614883679999999,True
CNAG_02432,conserved hypothetical protein,,2686.0,240.0,-3.484352994,1.151982978,True
CNAG_03333,YCR061W Protein of unknown function; green fluorescent protein (GFP)-fusion protein localizes to the cytoplasm in a punctate pattern; induced by treatment with 8-methoxypsoralen and UVA irradiation,,3732.0,315.0,-3.566525252,1.130370044,True
CNAG_06671,TKL-group protein kinase    PF00069.17 Pkinase PF02037.19 SAP PF07714.9 Pkinase_Tyr,,15979.0,1302.0,-3.6173757710000003,1.11699535,True
CNAG_00039,conserved hypothetical protein    PF00096.18 zf-C2H2,,3372.0,274.0,-3.6213567380000002,1.115948276,True
CNAG_03413,CNG3070 alginate lyase,,1616.0,130.0,-3.63584367,1.112137926,True
CNAG_04176,conserved hypothetical protein,,1687.0,132.0,-3.6758501389999996,1.101615431,True
CNAG_02788,conserved hypothetical protein    PF00170.13 bZIP_1,,19430.0,1494.0,-3.7010338480000002,1.094991616,True
CNAG_00435,conserved hypothetical protein,,9285.0,695.0,-3.739817027,1.084790871,True
CNAG_05046,predicted protein,,10813.0,771.0,-3.809892175,1.066359717,True
CNAG_05032,conserved hypothetical protein,,3603.0,256.0,-3.8149829360000003,1.0650207459999999,True
CNAG_04621,"GSY2 Glycogen synthase; expression induced by glucose limitation, nitrogen starvation, heat shock, and stationary phase; activity regulated by cAMP-dependent, Snf1p and Pho85p kinases as well as by the Gac1p-Glc7p phosphatase; GSY2 has a paralog, GSY1, that arose from the whole genome duplication","GSY1(Glycogen synthase, expressed in spores)",4660.0,324.0,-3.8462642369999998,1.056793144,True
CNAG_01232,PMC1 Vacuolar Ca2+ ATPase involved in depleting cytosol of Ca2+ ions; prevents growth inhibition by activation of calcineurin in the presence of elevated concentrations of calcium; similar to mammalian PMCA1a,PMC1(Putative calcium-transporting ATPase),4705.0,321.0,-3.87354952,1.049616573,True
CNAG_00692,FAD dependent oxidoreductase    PF01266.16 DAO,,1358.0,92.0,-3.883705808,1.046945268,True
CNAG_03060,multiple drug resistance protein    PF07690.8 MFS_1,,13398.0,901.0,-3.894346741,1.044146492,True
CNAG_04564,phytanoyl-CoA dioxygenase family protein    PF05721.5 PhyH,,6529.0,395.0,-4.046937483,1.0040121,True
CNAG_06787,metacaspase    PF00656.14 Peptidase_C14,,28506.0,1677.0,-4.0873110189999995,0.99339306,True
CNAG_02978,conserved hypothetical protein,,3960.0,230.0,-4.105794663999999,0.9885314940000001,True
CNAG_05686,hypothetical protein,,231.0,13.0,-4.151309323,0.976560236,True
CNAG_05663,WHI3 RNA binding protein that sequesters CLN3 mRNA in cytoplasmic foci; cytoplasmic retention factor for Cdc28p and associated cyclins; regulates cell fate and dose-dependently regulates the critical cell size required for passage through Start,,30325.0,1628.0,-4.219335041,0.958668124,True
CNAG_03727,conserved hypothetical protein    PF00169.21 PH,,113.0,6.0,-4.2352164619999995,0.954490995,True
CNAG_04782,"DCR2 Phosphoesterase involved in downregulation of the unfolded protein response, at least in part via dephosphorylation of Ire1p; dosage-dependent positive regulator of the G1/S phase transition through control of the timing of START",,384.0,20.0,-4.263034406,0.947174324,True
CNAG_01885,"PAP2 Non-canonical poly(A) polymerase, involved in nuclear RNA degradation as a component of the TRAMP complex; catalyzes polyadenylation of hypomodified tRNAs, and snoRNA and rRNA precursors; overlapping but non-redundant functions with Trf5p",,29431.0,1478.0,-4.315618388,0.9333436940000001,True
CNAG_07685,ATG22 Vacuolar integral membrane protein required for efflux of amino acids during autophagic body breakdown in the vacuole; null mutation causes a gradual loss of viability during starvation,,1522.0,76.0,-4.32382513,0.931185158,True
CNAG_01906,"MDM12 Mitochondrial outer membrane protein, required for transmission of mitochondria to daughter cells; component of the ERMES complex that links the ER to mitochondria; may influence import and assembly of outer membrane beta-barrel proteins",,14514.0,721.0,-4.331302105,0.929218565,True
CNAG_07903,TUS1 Guanine nucleotide exchange factor (GEF) that modulate Rho1p activity; involved in the cell integrity signaling pathway; interacts with Rgl1p; localization of Tus1p to the bed neck is regulated by Rgl1p; multicopy suppressor of tor2 mutation and ypk1 ypk2 double mutation; potential Cdc28p substrate,ROM20(GDP/GTP exchange factor (GEF)),38441.0,1897.0,-4.3408542830000005,0.9267061529999999,True
CNAG_00368,"VPS53 Component of the GARP (Golgi-associated retrograde protein) complex, Vps51p-Vps52p-Vps53p-Vps54p, which is required for the recycling of proteins from endosomes to the late Golgi; required for vacuolar protein sorting",,44444.0,2170.0,-4.356221719,0.922664213,True
CNAG_01032,conserved hypothetical protein,,11204.0,534.0,-4.391030336,0.913508856,True
CNAG_05229,CNI2770 stomatin-like protein,,3376.0,160.0,-4.399171094,0.911367675,True
CNAG_04254,conserved hypothetical protein,,893.0,42.0,-4.410198942,0.9084671320000001,True
CNAG_00995,"MSC1 Protein of unknown function; mutant is defective in directing meiotic recombination events to homologous chromatids; the authentic, non-tagged protein is detected in highly purified mitochondria and is phosphorylated",,1096.0,51.0,-4.425606741,0.904414576,True
CNAG_05523,conserved hypothetical protein    PF00642.16 zf-CCCH,,2022.0,93.0,-4.442408471,0.899995388,True
CNAG_06377,inorganic phosphate transporter    PF00153.19 Mito_carr PF00395.12 SLH,,6848.0,313.0,-4.451448139,0.8976177759999999,True
CNAG_07770,ferric reductase transmembrane component 2    PF01794.11 Ferric_reduct PF08022.4 FAD_binding_8 PF08030.4 NAD_binding_6,,12075.0,546.0,-4.466978428,0.8935330020000001,True
CNAG_04680,conserved hypothetical protein,,534.0,24.0,-4.475733431,0.891230262,True
CNAG_05693,conserved hypothetical protein,,16401.0,724.0,-4.501650274,0.884413619,True
CNAG_03450,ATP-binding cassette transporter    PF00005.19 ABC_tran PF00664.15 ABC_membrane,,12075.0,514.0,-4.554111019,0.870615402,True
CNAG_03146,alpha-amylase    PF00128.16 Alpha-amylase PF02806.10 Alpha-amylase_C,"AMY1(alpha-amylase, expresssed in spores)",31655.0,1341.0,-4.561052253,0.86878972,True
CNAG_05845,conserved hypothetical protein    PF08555.2 DUF1754,,387.0,16.0,-4.596189756,0.85954786,True
CNAG_03922,CIP1 protein,,13437.0,550.0,-4.610635643,0.855748305,True
CNAG_04606,conserved hypothetical protein    PF00646.25 F-box,,2985.0,122.0,-4.612777878999999,0.855184855,True
CNAG_02742,conserved hypothetical protein    PF00636.18 Ribonuclease_3,DCR1(Dicer; involved in regulating gene expression by RNA interference (RNAi)),499.0,18.0,-4.792971004,0.8077904890000001,True
CNAG_03498,metalloreductase    PF01794.11 Ferric_reduct PF08022.4 FAD_binding_8,?(Putative metalloreductase; Rim101-dependent expression in capsule inducing conditions),11881.0,419.0,-4.825562216000001,0.7992183540000001,True
CNAG_01497,integral membrane protein    PF07690.8 MFS_1,,3326.0,111.0,-4.905156587,0.7782834559999999,True
CNAG_05834,conserved hypothetical protein,,789.0,26.0,-4.923441771999999,0.77347409,True
CNAG_06563,eukaryotic translation initiation factor 3 subunit EifCf    PF01398.13 Mov34,,127.0,4.0,-4.988684687,0.7563139090000001,True
CNAG_02182,D-lactaldehyde dehydrogenase    PF01370.13 Epimerase,,560.0,17.0,-5.041820176,0.742338222,True
CNAG_05694,"CKA2 Alpha' catalytic subunit of casein kinase 2 (CK2); CK2 is a Ser/Thr protein kinase with roles in cell growth and proliferation; CK2, comprised of CKA1, CKA2, CKB1 and CKB2, has many substrates including transcription factors and all RNA polymerases; protein abundance increases in response to DNA replication stress",,1229.0,37.0,-5.053815835,0.7391831259999999,True
CNAG_01864,conserved hypothetical protein    PF00293.20 NUDIX,,36107.0,1033.0,-5.127366398,0.719837869,True
CNAG_02848,conserved hypothetical protein,,260.0,7.0,-5.215012891000001,0.696785103,True
CNAG_04869,carboxylesterases    PF00135.20 COesterase,?(Carboxylesterase found secreted/bound to cell wall)PNB1(Para-nitrobenzyl esterase),868.0,23.0,-5.237989276,0.690741858,True
CNAG_02553,SPS1904 putative oxidoreductase,,26845.0,683.0,-5.296624016,0.6753197590000001,True
CNAG_00492,conserved hypothetical protein,,119.0,3.0,-5.309855263,0.6718396790000001,True
CNAG_06781,conserved hypothetical protein,,981.0,23.0,-5.41454737,0.6443035779999999,True
CNAG_03321,VPS9 A guanine nucleotide exchange factor involved in vesicle-mediated vacuolar protein transport; specifically stimulates the intrinsic guanine nucleotide exchange activity of Vps21p/Rab5: similar to mammalian ras inhibitors; binds ubiquitin,,625.0,13.0,-5.587272661,0.598873401,True
CNAG_05768,conserved hypothetical protein,,321.0,6.0,-5.741466986,0.558317236,True
CNAG_04842,conserved hypothetical protein    PF08598.3 Sds3,,2789.0,52.0,-5.745092501,0.557363653,True
CNAG_02298,"NCR1 Vacuolar membrane protein that transits through the biosynthetic vacuolar protein sorting pathway, involved in sphingolipid metabolism; glycoprotein and functional orthologue of human Niemann Pick C1 (NPC1) protein",,113.0,2.0,-5.820178962000001,0.537614425,True
CNAG_00558,conserved hypothetical protein,,294.0,5.0,-5.87774425,0.522473613,True
CNAG_03407,predicted protein,,177.0,3.0,-5.8826430489999995,0.521185131,True
CNAG_00175,conserved hypothetical protein    PF03162.5 Y_phosphatase2,,178.0,3.0,-5.89077093,0.519047337,True
CNAG_07808,"AGX1 Alanine:glyoxylate aminotransferase (AGT), catalyzes the synthesis of glycine from glyoxylate, which is one of three pathways for glycine biosynthesis in yeast; has similarity to mammalian and plant alanine:glyoxylate aminotransferases",,5477.0,92.0,-5.895608209,0.517775037,True
CNAG_07441,conserved hypothetical protein,,786.0,13.0,-5.917945784,0.511899812,True
CNAG_04505,guanine nucleotide-binding protein subunit alpha    PF00503.12 G-alpha,"Gpa1(G protein involved in sensing glucose and regulating capsule/melanin synthesis in response)GPA1(G protein alpha subunit homolog, mutant was mating defective in nitrogen starvation, could not make melanin during glucose starvation and did not make capsule during iron limitation, virulence significantly attenuated in a mouse model)GPA1(Guanine nucleotide-binding protein subunit alpha; G-protein alpha-subunit)",922.0,15.0,-5.941732345,0.505643475,True
CNAG_03924,nit protein 1    PF00795.14 CN_hydrolase,,189.0,3.0,-5.977279922999999,0.49629375700000006,True
CNAG_03684,"MDL2 Mitochondrial inner membrane half-type ATP-binding cassette (ABC) transporter, required for respiratory growth at high temperature; similar to human TAP1 and TAP2 implicated in bare lymphocyte syndrome and Wegener-like granulomatosis",,451.0,7.0,-6.0096287010000005,0.487785387,True
CNAG_02138,"DNA2 Tripartite DNA replication factor with single-stranded DNA-dependent ATPase, ATP-dependent nuclease, and helicase activities; required for Okazaki fragment processing; involved in DNA repair; cell-cycle dependent localization",,26703.0,409.0,-6.02875718,0.48275421700000004,True
CNAG_06521,receptor    PF00083.16 Sugar_tr PF07690.8 MFS_1,"Snf3(Sensor of extracellular glucose, resembles transporter, homology to galactose transporter)",12825.0,194.0,-6.0467583629999995,0.478019549,True
CNAG_06012,"CBR1 Microsomal cytochrome b reductase, not essential for viability; also detected in mitochondria; mutation in conserved NADH binding domain of the human ortholog results in type I methemoglobinemia",,1983.0,28.0,-6.14611404,0.451887036,True
CNAG_06013,YIL067C Uncharacterized protein of unknown function,,1983.0,28.0,-6.14611404,0.451887036,True
CNAG_05044,YPR153W Putative protein of unknown function,,4065.0,57.0,-6.156149622999999,0.449247478,True
CNAG_07876,predicted protein,,145.0,2.0,-6.17990909,0.44299826700000006,True
CNAG_04245,chitinase    PF00704.20 Glyco_hydro_18,CHI22(Endochitinase),229.0,3.0,-6.254241287,0.423447425,True
CNAG_02228,conserved hypothetical protein,,157.0,2.0,-6.294620749,0.41282682600000004,True
CNAG_07645,predicted protein,,157.0,2.0,-6.294620749,0.41282682600000004,True
CNAG_02258,"MAK10 Non-catalytic subunit of N-terminal acetyltransferase of the NatC type, required for replication of dsRNA virus; expression is glucose-repressible",,326.0,4.0,-6.348728154,0.398595505,True
CNAG_04085,oxidoreductase    PF00389.22 2-Hacid_dh PF02826.11 2-Hacid_dh_C,,164.0,2.0,-6.357552005,0.39627465799999995,True
CNAG_05377,myo-inositol transporter 1    PF00083.16 Sugar_tr PF07690.8 MFS_1,ITR3(Myo-inositol transporter),254.0,3.0,-6.403722186,0.384130984,True
CNAG_01085,conserved hypothetical protein    PF00076.14 RRM_1,,22805.0,264.0,-6.43266843,0.376517548,True
CNAG_02893,"YHI9 Protein of unknown function; null mutant is defective in unfolded protein response; possibly involved in a membrane regulation metabolic pathway; member of the PhzF superfamily, though most likely not involved in phenazine production",,697.0,8.0,-6.445014846,0.373270196,True
CNAG_03858,conserved hypothetical protein,,788.0,9.0,-6.452126817999999,0.371399606,True
CNAG_01498,arylsulfatase    PF00884.15 Sulfatase PF09006.3 Surfac_D-trimer,,13464.0,152.0,-6.468891948,0.366990045,True
CNAG_00048,sugar transporter    PF00083.16 Sugar_tr PF07690.8 MFS_1,,267.0,3.0,-6.475733431,0.365190599,True
CNAG_06096,"YHM2 Carrier protein that exports citrate from and imports oxoglutarate into the mitochondrion, causing net export of NADPH reducing equivalents; also associates with mt nucleoids and has a role in replication and segregation of the mt genome",,268.0,3.0,-6.48112669,0.363772065,True
CNAG_01781,conserved hypothetical protein,,448.0,5.0,-6.485426827,0.36264104399999997,True
CNAG_01655,dynamin    PF00350.15 Dynamin_N PF01031.12 Dynamin_M PF02212.10 GED,,180.0,2.0,-6.491853096,0.36095080700000004,True
CNAG_04803,"SEC31 Component of the Sec13p-Sec31p complex of the COPII vesicle coat, required for vesicle formation in ER to Golgi transport; mutant has increased aneuploidy tolerance",,20808.0,227.0,-6.518302197000001,0.35399416899999997,True
CNAG_01422,YBR287W Protein of unknown function; green fluorescent protein (GFP)-fusion protein localizes to the ER; YBR287W is not an essential gene,,10737.0,116.0,-6.532322334,0.350306595,True
CNAG_03806,"YDR018C Probable membrane protein with three predicted transmembrane domains; homologous to Ybr042cp, similar to C. elegans F55A11.5 and maize 1-acyl-glycerol-3-phosphate acyltransferase",,189.0,2.0,-6.562242424,0.342437018,True
CNAG_06633,40s ribosomal protein s15    PF00203.13 Ribosomal_S19,,387.0,4.0,-6.596189756,0.333508197,True
CNAG_04238,"SPS19 Peroxisomal 2,4-dienoyl-CoA reductase, auxiliary enzyme of fatty acid beta-oxidation; homodimeric enzyme required for growth and sporulation on petroselineate medium; expression induced during late sporulation and in the presence of oleate",,196.0,2.0,-6.614709844,0.328637046,True
CNAG_05731,glyoxal oxidase    PF07250.3 Glyoxal_oxid_N PF09118.3 DUF1929,,200.0,2.0,-6.64385619,0.320970979,True
CNAG_05601,RIM13 Calpain-like cysteine protease; involved in proteolytic activation of Rim101p in response to alkaline pH; localizes to punctate structures in alkaline conditions and in vps4 mutant; has similarity to A. nidulans palB,,101.0,1.0,-6.658211483,0.317195253,True
CNAG_03566,conserved hypothetical protein,,406.0,4.0,-6.665335917,0.315321385,True
CNAG_07341,"PEX11 Peroxisomal membrane protein required for medium-chain fatty acid oxidation and peroxisome proliferation, possibly by inducing membrane curvature; localization regulated by phosphorylation; transcription regulated by Adr1p and Pip2p-Oaf1p",,307.0,3.0,-6.677132345,0.312218691,True
CNAG_00758,regulatory protein ral2    PF01344.17 Kelch_1 PF07646.7 Kelch_2,,620.0,6.0,-6.691161905,0.308528638,True
CNAG_01603,conserved hypothetical protein,,621.0,6.0,-6.693486957,0.307917103,True
CNAG_05107,GIM3 Subunit of the heterohexameric cochaperone prefoldin complex which binds specifically to cytosolic chaperonin and transfers target proteins to it,,208.0,2.0,-6.700439717999999,0.30608838899999996,True
CNAG_05109,CBS and PB1 domain-containing protein    PF00564.16 PB1 PF00571.20 CBS,,208.0,2.0,-6.700439717999999,0.30608838899999996,True
CNAG_02446,response regulator receiver domain-containing protein    PF07080.3 DUF1348,,1257.0,12.0,-6.710806433999999,0.303361737,True
CNAG_00594,"YEH2 Steryl ester hydrolase, catalyzes steryl ester hydrolysis at the plasma membrane; involved in sterol metabolism",,106.0,1.0,-6.727920455,0.29886041,True
CNAG_06806,"AIM45 Putative ortholog of mammalian electron transfer flavoprotein complex subunit ETF-alpha; interacts with frataxin, Yfh1p; null mutant displays elevated frequency of mitochondrial genome loss; may have a role in oxidative stress response",ETF1(Electron transfer flavoprotein alpha subunit; encoded on the MAT locus),108.0,1.0,-6.754887502000001,0.291767542,True
CNAG_00467,conserved hypothetical protein    PF00173.20 Cyt-b5,,547.0,5.0,-6.773468928,0.28688025899999997,True
CNAG_03977,conserved hypothetical protein    PF02183.10 HALZ,,111.0,1.0,-6.7944158660000005,0.28137079800000003,True
CNAG_06136,conserved hypothetical protein    PF00023.22 Ank PF00172.10 Zn_clus,,113.0,1.0,-6.820178962000001,0.274594593,True
CNAG_01203,"YVH1 Protein phosphatase involved in vegetative growth at low temperatures, sporulation, and glycogen accumulation; mutants are defective in 60S ribosome assembly; member of the dual-specificity family of protein phosphatases",,226.0,2.0,-6.820178962000001,0.274594593,True
CNAG_00444,predicted protein,,114.0,1.0,-6.832890014,0.271251335,True
CNAG_01070,class II aldolase/adducin family protein    PF00596.13 Aldolase_II,,116.0,1.0,-6.857980995,0.26465190899999996,True
CNAG_01270,conserved hypothetical protein    PF02020.10 W2,,116.0,1.0,-6.857980995,0.26465190899999996,True
CNAG_00667,conserved hypothetical protein,,232.0,2.0,-6.857980995,0.26465190899999996,True
CNAG_05684,conserved hypothetical protein,,236.0,2.0,-6.8826430489999995,0.2581653,True
CNAG_02741,"1-Oct Mitochondrial intermediate peptidase, cleaves destabilizing N-terminal residues of a subset of proteins upon import, after their cleavage by mitochondrial processing peptidase (Mas1p-Mas2p); may contribute to mitochondrial iron homeostasis",,474.0,4.0,-6.888743249,0.256560826,True
CNAG_01795,conserved hypothetical protein,,359.0,3.0,-6.902877533,0.252843229,True
CNAG_02777,PHO840 putative phosphate transporter,PHO84(Inorganic phosphate transporter),241.0,2.0,-6.912889336,0.250209926,True
CNAG_01510,"POM152 Glycoprotein subunit of the transmembrane ring of the nuclear pore complex (NPC); contributes to nucleocytoplasmic transport, NPC biogenesis and spindle pole body duplication; homologous to human NUP210",,121.0,1.0,-6.918863237,0.248638672,True
CNAG_02912,conserved hypothetical protein    PF02985.14 HEAT,,364.0,3.0,-6.922832139,0.247594772,True
CNAG_00728,dityrosine transporter    PF07690.8 MFS_1,,979.0,8.0,-6.93516505,0.244350972,True
CNAG_04030,predicted protein,,123.0,1.0,-6.942514505,0.24241791899999998,True
CNAG_06552,SNF102(VM) AMP-activated kinase; ortholog of S. cerevisiae Snf1,,123.0,1.0,-6.942514505,0.24241791899999998,True
CNAG_03337,conserved hypothetical protein,,494.0,4.0,-6.948367232000001,0.240878536,True
CNAG_05683,conserved hypothetical protein,,251.0,2.0,-6.971543554,0.23478270399999998,True
CNAG_01929,conserved hypothetical protein,,629.0,5.0,-6.974988112,0.23387671699999998,True
CNAG_06893,conserved hypothetical protein,,629.0,5.0,-6.974988112,0.23387671699999998,True
CNAG_01936,sugar transporter    PF00083.16 Sugar_tr PF07690.8 MFS_1,,1394.0,11.0,-6.985583227,0.23108999100000002,True
CNAG_03063,conserved hypothetical protein    PF00383.14 dCMP_cyt_deam_1,,385.0,3.0,-7.003752135,0.226311208,True
CNAG_01992,conserved hypothetical protein,,257.0,2.0,-7.005624549,0.22581872600000003,True
CNAG_00797,"ACS2 Acetyl-coA synthetase isoform which, along with Acs1p, is the nuclear source of acetyl-coA for histone acetylation; mutants affect global transcription; required for growth on glucose; expressed under anaerobic conditions",,644.0,5.0,-7.0089887829999995,0.224933866,True
CNAG_02969,thioesterase family protein    PF03061.14 4HBT,,130.0,1.0,-7.022367813,0.22141491600000002,True
CNAG_00961,RRT8 Putative protein of unknown function; identified in a screen for mutants with increased levels of rDNA transcription; green fluorescent protein (GFP)-fusion protein localizes to lipid particles; protein abundance increases in response to DNA replication stress,,782.0,6.0,-7.026062297,0.220443193,True
CNAG_02141,conserved hypothetical protein,,261.0,2.0,-7.027905997,0.219958264,True
CNAG_01426,"PEP8 Vacuolar protein component of the retromer; forms part of the multimeric membrane-associated retromer complex involved in vacuolar protein sorting along with Vps35p, Vps29p, Vps17p, and Vps5p; essential for endosome-to-Golgi retrograde protein transport; interacts with Ypt7p; protein abundance increases in response to DNA replication stress",,133.0,1.0,-7.055282436000001,0.21275771699999999,True
CNAG_05756,"FMP32 Putative protein of unknown function; the authentic, non-tagged protein is detected in highly purified mitochondria in high-throughput studies",,133.0,1.0,-7.055282436000001,0.21275771699999999,True
CNAG_05873,conserved hypothetical protein,,668.0,5.0,-7.061776198,0.211049729,True
CNAG_01088,conserved hypothetical protein,,134.0,1.0,-7.06608919,0.20991532699999998,True
CNAG_01177,"NEM1 Probable catalytic subunit of Nem1p-Spo7p phosphatase holoenzyme; regulates nuclear growth by controlling phospholipid biosynthesis, required for normal nuclear envelope morphology and sporulation; homolog of the human protein Dullard",,135.0,1.0,-7.076815597,0.207094069,True
CNAG_04546,multidrug transporter    PF07690.8 MFS_1,,681.0,5.0,-7.089582892999999,0.203736017,True
CNAG_03243,YJR149W Putative protein of unknown function; green fluorescent protein (GFP)-fusion protein localizes to the cytoplasm,,5870.0,43.0,-7.092880032999999,0.20286880399999999,True
CNAG_06832,glucosidase    PF03935.7 SKN1,Kre62(Involved in cell wall synthesis)KRE62(Putative beta-glucan synthase),139.0,1.0,-7.118941072999999,0.196014233,True
CNAG_02664,"DLD3 D-lactate dehydrogenase, part of the retrograde regulon which consists of genes whose expression is stimulated by damage to mitochondria and reduced in cells grown with glutamate as the sole nitrogen source, located in the cytoplasm",,837.0,6.0,-7.124121312000001,0.194651728,True
CNAG_00363,two-component sensor molecule    PF00072.16 Response_reg PF00512.17 HisKA PF01590.18 GAF PF02518.18 HATPase_c,TCO6(Two-component-like sensor kinase),1818.0,13.0,-7.127696766000001,0.193711312,True
CNAG_05301,"CRN1 Coronin, cortical actin cytoskeletal component that associates with the Arp2p/Arp3p complex to regulate its activity; plays a role in regulation of actin patch assembly",?(Deoxyuridine 5'-triphosphate nucleotidohydrolase),140.0,1.0,-7.1292830170000006,0.193294097,True
CNAG_00407,glyoxal oxidase    PF07250.3 Glyoxal_oxid_N PF09118.3 DUF1929,?(Glyoxyloxidase found secreted/bound to cell wall)?(Putative glyoxal oxidase),2246.0,16.0,-7.133142212,0.192279052,True
CNAG_01943,conserved hypothetical protein    PF01652.10 IF4E,,141.0,1.0,-7.139551352000001,0.190593321,True
CNAG_02554,sugar transporter    PF00083.16 Sugar_tr PF07690.8 MFS_1,,282.0,2.0,-7.139551352000001,0.190593321,True
CNAG_01069,conserved hypothetical protein    PF00172.10 Zn_clus PF04082.10 Fungal_trans,,2126.0,15.0,-7.147035286,0.188624898,True
CNAG_01743,conserved hypothetical protein,,284.0,2.0,-7.14974712,0.187911632,True
CNAG_04545,conserved hypothetical protein,,427.0,3.0,-7.153129759,0.187021931,True
CNAG_05539,conserved hypothetical protein,,143.0,1.0,-7.159871337,0.18524876199999998,True
CNAG_02822,conserved hypothetical protein,,289.0,2.0,-7.174925683,0.18128917100000003,True
CNAG_07539,"RFC1 Subunit of heteropentameric Replication factor C (RF-C), which is a DNA binding protein and ATPase that acts as a clamp loader of the proliferating cell nuclear antigen (PCNA) processivity factor for DNA polymerases delta and epsilon",,435.0,3.0,-7.17990909,0.17997843600000002,True
CNAG_04273,conserved hypothetical protein,,295.0,2.0,-7.204571144,0.17349182600000002,True
CNAG_05398,"SER1 3-phosphoserine aminotransferase; catalyzes the formation of phosphoserine from 3-phosphohydroxypyruvate, required for serine and glycine biosynthesis; regulated by the general control of amino acid biosynthesis mediated by Gcn4p; protein abundance increases in response to DNA replication stress",,450.0,3.0,-7.22881869,0.167114241,True
CNAG_05931,YHC3 Vacuolar membrane protein involved in the ATP-dependent transport of arginine into the vacuole and possibly in balancing ion homeostasis; homolog of human CLN3 involved in Batten disease (juvenile onset neuronal ceroid lipofuscinosis),,451.0,3.0,-7.232021122999999,0.166271938,True
CNAG_03979,YLR243W Putative protein of unknown function; YLR243W is an essential gene,,154.0,1.0,-7.266786541,0.15712794300000002,True
CNAG_03980,conserved hypothetical protein,,154.0,1.0,-7.266786541,0.15712794300000002,True
CNAG_00879,"GDH2 NAD(+)-dependent glutamate dehydrogenase, degrades glutamate to ammonia and alpha-ketoglutarate; expression sensitive to nitrogen catabolite repression and intracellular ammonia levels",?(Glutamate dehydrogenase),616.0,4.0,-7.266786541,0.15712794300000002,True
CNAG_01828,"SWD1 Subunit of the COMPASS (Set1C) complex, which methylates histone H3 on lysine 4 and is required in transcriptional silencing near telomeres; WD40 beta propeller superfamily member with similarity to mammalian Rbbp7",,629.0,4.0,-7.296916207000001,0.149203244,True
CNAG_07445,"TKL1 Transketolase; catalyzes conversion of xylulose-5-phosphate and ribose-5-phosphate to sedoheptulose-7-phosphate and glyceraldehyde-3-phosphate in the pentose phosphate pathway; needed for synthesis of aromatic amino acids; TKL1 has a paralog, TKL2, that arose from the whole genome duplication",,635.0,4.0,-7.310612782000001,0.14560077300000002,True
CNAG_06314,"ADE5,7 Bifunctional enzyme of the 'de novo' purine nucleotide biosynthetic pathway, contains aminoimidazole ribotide synthetase and glycinamide ribotide synthetase activities",,160.0,1.0,-7.321928095,0.142624621,True
CNAG_05344,"IZH3 Membrane protein involved in zinc ion homeostasis, member of the four-protein IZH family, expression induced by zinc deficiency; deletion reduces sensitivity to elevated zinc and shortens lag phase, overexpression reduces Zap1p activity",,960.0,6.0,-7.321928095,0.142624621,True
CNAG_02594,conserved hypothetical protein,,161.0,1.0,-7.330916877999999,0.140260393,True
CNAG_01346,"YOR283W Phosphatase with a broad substrate specificity and some similarity to GPM1/YKL152C, a phosphoglycerate mutase; YOR283W is not an essential gene",,163.0,1.0,-7.348728154,0.135575674,True
CNAG_05116,beta DNA polymerase    PF00533.18 BRCT PF01909.15 NTP_transf_2,,163.0,1.0,-7.348728154,0.135575674,True
CNAG_00066,membrane protein,,489.0,3.0,-7.348728154,0.135575674,True
CNAG_00122,alpha-amylase    PF00128.16 Alpha-amylase PF09260.3 DUF1966,,489.0,3.0,-7.348728154,0.135575674,True
CNAG_00652,conserved hypothetical protein,,327.0,2.0,-7.353146825,0.134413476,True
CNAG_04892,conserved hypothetical protein,,165.0,1.0,-7.366322214,0.130948087,True
CNAG_07349,YPR147C Putative protein of unknown function; green fluorescent protein (GFP)-fusion protein localizes to the cytoplasm and is induced in response to the DNA-damaging agent MMS,,165.0,1.0,-7.366322214,0.130948087,True
CNAG_05541,MOB1 Component of the mitotic exit network; associates with and is required for the activation and Cdc15p-dependent phosphorylation of the Dbf2p kinase; required for cytokinesis and cell separation; component of the CCR4 transcriptional complex,,330.0,2.0,-7.366322214,0.130948087,True
CNAG_04363,conserved hypothetical protein    PF00560.25 LRR_1 PF05725.4 FNIP PF08263.4 LRRNT_2,,8818.0,53.0,-7.378315307,0.127793666,True
CNAG_02665,conserved hypothetical protein,,837.0,5.0,-7.387155718,0.125468463,True
CNAG_00442,cyclin    PF00134.15 Cyclin_N,,1852.0,11.0,-7.395436765,0.123290383,True
CNAG_03486,"CPR2 Peptidyl-prolyl cis-trans isomerase (cyclophilin), catalyzes the cis-trans isomerization of peptide bonds N-terminal to proline residues; has a potential role in the secretory pathway",,171.0,1.0,-7.417852515,0.11739459599999999,True
CNAG_00326,"DJP1 Cytosolic J-domain-containing protein, required for peroxisomal protein import and involved in peroxisome assembly, homologous to E. coli DnaJ",,354.0,2.0,-7.46760555,0.104308561,True
CNAG_02925,d-arabinitol 2-dehydrogenase    PF00106.17 adh_short,,179.0,1.0,-7.483815777,0.10004495,True
CNAG_06775,conserved hypothetical protein    PF08213.3 DUF1713,,358.0,2.0,-7.483815777,0.10004495,True
CNAG_03133,"UDP-glucose,sterol transferase",ATG2602(UDP-glucose sterol transferase; Gat201-regulated),717.0,4.0,-7.485829309,0.099515351,True
CNAG_01741,conserved hypothetical protein,,899.0,5.0,-7.490249211,0.098352829,True
CNAG_03966,conserved hypothetical protein,,180.0,1.0,-7.491853096,0.097930976,True
CNAG_04110,URE2 Nitrogen catabolite repression transcriptional regulator that acts by inhibition of GLN3 transcription in good nitrogen source; has glutathione peroxidase activity and can mutate to acquire GST activity; altered form creates [URE3] prion,,360.0,2.0,-7.491853096,0.097930976,True
CNAG_03235,conserved hypothetical protein,,363.0,2.0,-7.503825738,0.09478193300000001,True
CNAG_03394,conserved hypothetical protein,,365.0,2.0,-7.5117526539999995,0.09269699699999999,True
CNAG_06469,phospholipid-translocating ATPase    PF00702.18 Hydrolase,APT1(Aminophospholipid translocase(flippase); P-type ATPase),369.0,2.0,-7.527477006,0.088561181,True
CNAG_03481,predicted protein,,556.0,3.0,-7.5339785720000005,0.08685114,True
CNAG_01297,conserved hypothetical protein,,186.0,1.0,-7.539158811,0.085488635,True
CNAG_00823,cadmium ion transporter    PF00005.19 ABC_tran PF00664.15 ABC_membrane,,1117.0,6.0,-7.54045097,0.085148771,True
CNAG_04650,"ARP6 Actin-related protein that binds nucleosomes; a component of the SWR1 complex, which exchanges histone variant H2AZ (Htz1p) for chromatin-bound histone H2A",,373.0,2.0,-7.54303182,0.084469956,True
CNAG_05390,conserved hypothetical protein,,565.0,3.0,-7.557144557000001,0.080758027,True
CNAG_01841,predicted protein    PF00320.19 GATA,GLN3(GATA family transcription factor; Gat201-regulated),566.0,3.0,-7.559695742000001,0.080087014,True
CNAG_04835,dihydrodipicolinate synthase DapA    PF00701.14 DHDPS,,380.0,2.0,-7.569855607999999,0.077414768,True
CNAG_04994,conserved hypothetical protein    PF02290.7 SRP14,,380.0,2.0,-7.569855607999999,0.077414768,True
CNAG_01571,conserved hypothetical protein,,570.0,3.0,-7.569855607999999,0.077414768,True
CNAG_03732,YDR090C Putative protein of unknown function,,573.0,3.0,-7.5774288279999995,0.075422861,True
CNAG_02008,YLR179C Protein of unknown function with similarity to Tfs1p; transcription is activated by paralogous proteins Yrm1p and Yrr1p along with proteins involved in multidrug resistance; GFP-tagged protein localizes to the cytoplasm and nucleus,OVA1(Putative phosphatidylethanolamine-binding protein),194.0,1.0,-7.599912842,0.06950912,True
CNAG_04230,"THI6 Bifunctional enzyme with thiamine-phosphate pyrophosphorylase and 4-methyl-5-beta-hydroxyethylthiazole kinase activities, required for thiamine biosynthesis; GFP-fusion protein localizes to the cytoplasm in a punctate pattern",,584.0,3.0,-7.604862057999999,0.068207378,True
CNAG_04229,phytanoyl-CoA dioxygenase family protein    PF05721.5 PhyH PF08076.3 TetM_leader,,585.0,3.0,-7.6073303139999995,0.067558177,True
CNAG_07450,predicted protein,,588.0,3.0,-7.614709844,0.065617215,True
CNAG_01958,het-c2 protein    PF08718.3 GLTP,,6878.0,35.0,-7.618490383999999,0.06462285799999999,True
CNAG_02676,VAM7 Vacuolar SNARE protein; functions with Vam3p in vacuolar protein trafficking; has an N-terminal PX domain (phosphoinositide-binding module) that binds PtdIns-3-P and mediates membrane binding; SNAP-25 homolog; protein abundance increases in response to DNA replication stress,,787.0,4.0,-7.6202198260000005,0.06416798,True
CNAG_06413,hypothetical protein,,789.0,4.0,-7.62388149,0.06320489,True
CNAG_06414,"COX23 Mitochondrial intermembrane space protein that functions in mitochondrial copper homeostasis, essential for functional cytochrome oxidase expression; homologous to Cox17p; contains twin cysteine-x9-cysteine motifs",,789.0,4.0,-7.62388149,0.06320489,True
CNAG_00172,KIP3 Kinesin-related motor protein involved in mitotic spindle positioning,,988.0,5.0,-7.626439137,0.062532178,True
CNAG_07682,conserved hypothetical protein    PF04886.4 PT,,598.0,3.0,-7.639039173,0.059218118,True
CNAG_02863,predicted protein,,200.0,1.0,-7.64385619,0.057951148,True
CNAG_06505,conserved hypothetical protein,,200.0,1.0,-7.64385619,0.057951148,True
CNAG_04607,"SFT1 Intra-Golgi v-SNARE, required for transport of proteins between an early and a later Golgi compartment",,400.0,2.0,-7.64385619,0.057951148,True
CNAG_00909,"CAB3 Subunit of a phosphopantothenoylcysteine decarboxylase (PPCDC; Cab3p, Sis2p, Vhs3p) complex, which catalyzes the third step of coenzyme A biosynthesis; null mutant lethality is complemented by E. coli coaBC",,202.0,1.0,-7.658211483,0.054175420999999994,True
CNAG_01087,conserved hypothetical protein    PF00097.17 zf-C3HC4,,404.0,2.0,-7.658211483,0.054175420999999994,True
CNAG_05721,FOX2 Multifunctional enzyme of the peroxisomal fatty acid beta-oxidation pathway; has 3-hydroxyacyl-CoA dehydrogenase and enoyl-CoA hydratase activities,MFE-2(Peroxisomal multifunctional enzyme type 2--D-3-hydroxyacyl-CoA dehydratase and dehydrogenase for FA oxidation)MFE2(Multifunctional enzyme of the peroxisomal fatty acid beta-oxidation pathway; 3-hydroxyacyl-CoA dehydrogenase and enoyl-CoA hydratase activities),3234.0,16.0,-7.659103963,0.053940681,True
CNAG_07798,amidohydrolase 3    PF07969.3 Amidohydro_3,,810.0,4.0,-7.661778097999999,0.05323733,True
CNAG_02350,conserved hypothetical protein,,204.0,1.0,-7.672425342,0.050436894,True
CNAG_07701,CTR2,Ctr2(Copper transporter shown to inhibit phagocytosis by macrophages)CTR2(Putative copper ion transporter),612.0,3.0,-7.672425342,0.050436894,True
CNAG_03782,conserved hypothetical protein,,205.0,1.0,-7.679480099999999,0.048581353,True
CNAG_06302,PEP2,,615.0,3.0,-7.679480099999999,0.048581353,True
CNAG_00031,conserved hypothetical protein    PF00172.10 Zn_clus PF04082.10 Fungal_trans,,1665.0,8.0,-7.701306462000001,0.042840587,True
CNAG_06035,alcohol dehydrogenase    PF00107.18 ADH_zinc_N PF08240.4 ADH_N,,418.0,2.0,-7.707359132000001,0.041248613999999996,True
CNAG_04658,conserved hypothetical protein,,1674.0,8.0,-7.7090838129999995,0.040794989,True
CNAG_01760,conserved hypothetical protein,,210.0,1.0,-7.714245517999999,0.039437358,True
CNAG_02377,aldehyde dehydrogenase    PF00171.14 Aldedh,,210.0,1.0,-7.714245517999999,0.039437358,True
CNAG_01445,"ATG9 Transmembrane protein involved in forming Cvt and autophagic vesicles; cycles between the phagophore assembly site (PAS) and other cytosolic punctate structures, not found in autophagosomes; may be involved in membrane delivery to the PAS",APG9(Autophagy-related protein),1473.0,7.0,-7.717186793,0.038663745,True
CNAG_01643,YSY6 Protein whose expression suppresses a secretory pathway mutation in E. coli; has similarity to the mammalian RAMP4 protein involved in secretion,,423.0,2.0,-7.7245138529999995,0.036736582999999996,True
CNAG_04800,"FRS2 Alpha subunit of cytoplasmic phenylalanyl-tRNA synthetase, forms a tetramer with Frs1p to form active enzyme; evolutionarily distant from mitochondrial phenylalanyl-tRNA synthetase based on protein sequence, but substrate binding is similar",,846.0,4.0,-7.7245138529999995,0.036736582999999996,True
CNAG_04077,hypothetical protein,,1062.0,5.0,-7.730639956,0.035125296,True
CNAG_01658,conserved hypothetical protein,,1063.0,5.0,-7.731997787,0.03476816,True
CNAG_03012,QSP1 quorum-sensing peptide,CQS1(Quorum sensing peptide only functional in a tup1 deletion strain)CQS1(Quorum sensing-like molecule),1915.0,9.0,-7.733203675,0.034450987,True
CNAG_01902,"CYC8 General transcriptional co-repressor, acts together with Tup1p; also acts as part of a transcriptional co-activator complex that recruits the SWI/SNF and SAGA complexes to promoters; can form the prion [OCT+]",,5962.0,28.0,-7.734225737999999,0.034182164,True
CNAG_03771,DNA binding protein Ncp1    PF04886.4 PT,,1713.0,8.0,-7.742309436,0.032055991,True
CNAG_00075,conserved hypothetical protein,,871.0,4.0,-7.766528909,0.02568579,True
CNAG_02550,conserved hypothetical protein,,658.0,3.0,-7.776981273,0.022936611000000003,True
CNAG_01043,conserved hypothetical protein,,2414.0,11.0,-7.777778342,0.022726966,True
CNAG_02658,conserved hypothetical protein    PF08613.3 Cyclin,,878.0,4.0,-7.77807713,0.022648379,True
CNAG_05914,MFS maltose permease MalP    PF00083.16 Sugar_tr PF07690.8 MFS_1,,440.0,2.0,-7.781359714,0.021784994,True
CNAG_07188,conserved hypothetical protein,,441.0,2.0,-7.784634846,0.020923569,True
CNAG_00470,DID2 Class E protein of the vacuolar protein-sorting (Vps) pathway; binds Vps4p and directs it to dissociate ESCRT-III complexes; forms a functional and physical complex with Ist1p; human ortholog may be altered in breast tumors,,442.0,2.0,-7.787902559,0.020064096,True
CNAG_02509,conserved hypothetical protein,,884.0,4.0,-7.787902559,0.020064096,True
CNAG_03204,conserved hypothetical protein,?(Protein found secreted/bound to cell wall),222.0,1.0,-7.7944158660000005,0.018350967,True
CNAG_07674,conserved hypothetical protein,,888.0,4.0,-7.7944158660000005,0.018350967,True
CNAG_05084,DOA1 WD repeat protein required for ubiquitin-mediated protein degradation; forms a complex with Cdc48p; plays a role in controlling cellular ubiquitin concentration; also promotes efficient NHEJ in postdiauxic/stationary phase; protein abundance increases in response to DNA replication stress,,1114.0,5.0,-7.799605422000001,0.016986011000000002,True
CNAG_07558,"SBA1 Co-chaperone that binds to and regulates Hsp90 family chaperones; important for pp60v-src activity in yeast; homologous to the mammalian p23 proteins, and like p23 can regulate telomerase activity; protein abundance increases in response to DNA replication stress",,670.0,3.0,-7.803054785,0.01607876,True
CNAG_02718,NAD binding dehydrogenase family protein    PF01408.14 GFO_IDH_MocA PF08635.2 ox_reductase_C,,672.0,3.0,-7.807354922000001,0.014947739,True
CNAG_04126,hypothetical protein,,1353.0,6.0,-7.816983623,0.012415198999999998,True
CNAG_05153,conserved hypothetical protein    PF00320.19 GATA PF02178.11 AT_hook,,1817.0,8.0,-7.827342703999999,0.009690555,True
CNAG_00115,"XYL2 Xylitol dehydrogenase, converts xylitol to D-xylulose; expression induced by xylose, even though this pentose sugar is not well utilized by S. cerevisiae; null mutant has cell wall defect",?(Sorbitol dehydrogenase),455.0,2.0,-7.829722735,0.00906456,True
CNAG_07768,predicted protein,,8876.0,39.0,-7.830291732999999,0.008914901999999999,True
CNAG_03234,cell wall surface anchor protein,"cnMUC1(named because it is homologous to MUC1 in cerevisiae? (GPI-anchored cell surface glycoprotein required for pseudohyphal formation, invasive growth, flocculation, and biofilms))",228.0,1.0,-7.832890014,0.008231503000000001,True
CNAG_03143,"HSP12 Plasma membrane protein involved in maintaining membrane organization in stress conditions; induced by heat shock, oxidative stress, osmostress, stationary phase, glucose depletion, oleate and alcohol; regulated by HOG and Ras-Pka pathways; protein abundance increases in response to DNA replication stress",,457.0,2.0,-7.836050355,0.007400271,True
CNAG_03677,conserved hypothetical protein,,687.0,3.0,-7.839203788,0.006570855,True
CNAG_04717,conserved hypothetical protein,,1145.0,5.0,-7.839203788,0.006570855,True
CNAG_01115,YPR117W Putative protein of unknown function,,459.0,2.0,-7.842350343,0.005743249000000001,True
CNAG_01209,"FAB1 1-phosphatidylinositol-3-phosphate 5-kinase; vacuolar membrane kinase that generates phosphatidylinositol (3,5)P2, which is involved in vacuolar sorting and homeostasis",,920.0,4.0,-7.8454900510000005,0.004917443,True
CNAG_06654,YLR050C Putative protein of unknown function; green fluorescent protein (GFP)-fusion protein localizes to the endoplasmic reticulum; YLR050C is not an essential gene,,461.0,2.0,-7.84862294,0.004093431,True
CNAG_01252,"TUM1 Rhodanese domain sulfur transferase, accepts persulfite from Nfs1p and transfers it to Uba4p in the pathway for 2-thiolation of the wobble uridine base of tRNAs; also stimulates sulfur transfer by Nfs1p; may be mitochondrially localized",,462.0,2.0,-7.851749041000001,0.003271205,True
CNAG_06868,enolase 1    PF00113.14 Enolase_C PF03952.8 Enolase_N,,695.0,3.0,-7.855906667,0.0021776670000000003,True
CNAG_00791,conserved hypothetical protein    PF00010.18 HLH,,1393.0,6.0,-7.8590170420000005,0.001359577,True
CNAG_00662,"YDL086W Putative protein of unknown function; the authentic, non-tagged protein is detected in highly purified mitochondria in high-throughput studies; YDL086W is not an essential gene",,233.0,1.0,-7.864186145,0.0,True
CNAG_02824,domain-containing protein    PF02636.9 DUF185,,233.0,1.0,-7.864186145,0.0,True
CNAG_02965,conserved hypothetical protein    PF06201.5 DUF1000,,233.0,1.0,-7.864186145,0.0,True
CNAG_06423,YOR223W Protein of unknown function found in the ER and vacuole lumen; overexpression of YOR223W affects endocytic protein trafficking,,467.0,2.0,-7.86727874,-0.0008134139999999999,True
CNAG_02882,conserved hypothetical protein,,468.0,2.0,-7.87036472,-0.0016250879999999998,True
CNAG_06501,"GAS1 Beta-1,3-glucanosyltransferase, required for cell wall assembly and also has a role in transcriptional silencing; localizes to the cell surface via a glycosylphosphatidylinositol (GPI) anchor; also found at the nuclear periphery",Gas1(Glucanosyltransferase found secreted/bound to cell wall),1652.0,7.0,-7.8826430489999995,-0.004854532,True
CNAG_01763,OXP1 5-oxoprolinase; enzyme is ATP-dependent and functions as a dimer; similar to mouse Oplah gene; green fluorescent protein (GFP)-fusion protein localizes to the cytoplasm; protein abundance increases in response to DNA replication stress,,709.0,3.0,-7.884679317000001,-0.0053901109999999995,True
CNAG_05320,oxidoreductase family protein    PF01408.14 GFO_IDH_MocA PF02894.9 GFO_IDH_MocA_C,,473.0,2.0,-7.885696372999999,-0.005657616999999999,True
CNAG_03034,REX3 RNA exonuclease; required for maturation of the RNA component of RNase MRP; functions redundantly with Rnh70p and Rex2p in processing of U5 snRNA and RNase P RNA; member of RNase D family of exonucleases,,710.0,3.0,-7.886712714,-0.005924934000000001,True
CNAG_05026,mango esterase    PF00657.14 Lipase_GDSL,,1189.0,5.0,-7.893604905,-0.007737717,True
CNAG_04970,conserved hypothetical protein,,714.0,3.0,-7.894817763,-0.008056723,True
CNAG_06593,rhamnogalacturonan lyase,,715.0,3.0,-7.896836931,-0.008587804000000001,True
CNAG_04581,conserved hypothetical protein,,478.0,2.0,-7.900866808,-0.009647741999999999,True
CNAG_00383,"DNF1 Aminophospholipid translocase (flippase) that localizes primarily to the plasma membrane; contributes to endocytosis, protein transport and cell polarity; type 4 P-type ATPase",APT3(Aminophospholipid translocase (flippase)),725.0,3.0,-7.916874684,-0.013858131000000001,True
CNAG_03859,transcriptional regulator Medusa,,486.0,2.0,-7.924812504,-0.015945935,True
CNAG_04329,conserved hypothetical protein,,487.0,2.0,-7.927777962,-0.016725909,True
CNAG_03622,"TAO3 Component of the RAM signaling network that is involved in regulation of Ace2p activity and cellular morphogenesis, interacts with protein kinase Cbk1p and also with Kic1p",TAO3(?),1467.0,6.0,-7.933690655,-0.018281065,True
CNAG_01850,TCO1(V),"Tco1(Sensor kinase mediating stress response, subtle capsule defect, hypermelanization, shown to be required for virulence, sensitive to hypoxic conditions, but doesn't seem to have a transcriptional impact)TCO1(Two-component-like sensor kinase)",490.0,2.0,-7.936637939,-0.019056259,True
CNAG_01114,predicted protein,,1477.0,6.0,-7.94349161,-0.02085891,True
CNAG_07410,CID1    PF01909.15 NTP_transf_2 PF03828.11 PAP_assoc,CID1(CID1-family polyA polymerase; encoded on MAT locus),493.0,2.0,-7.945443836,-0.021372383999999998,True
CNAG_04561,monooxygenase protein,,745.0,3.0,-7.956134115,-0.02418414,True
CNAG_04025,transaldolase    PF00923.11 Transaldolase,,2236.0,9.0,-7.956779471,-0.024353881,True
CNAG_03628,"VPS45 Protein of the Sec1p/Munc-18 family, essential for vacuolar protein sorting; required for the function of Pep12p and the early endosome/late Golgi SNARE Tlg2p; essential for fusion of Golgi-derived vesicles with the prevacuolar compartment","VPS45(Vacuolar sorting protein required for antiphagocytosis, extracellular iron acquisition, and cell wall integrity signaling)",250.0,1.0,-7.965784285,-0.026722326,True
CNAG_07745,mannitol-1-phosphate dehydrogenase    PF00107.18 ADH_zinc_N PF08240.4 ADH_N,?(Mannitol-1 phosphate dehydrogenase),1006.0,4.0,-7.97441459,-0.028992267000000002,True
CNAG_01493,conserved hypothetical protein,,2017.0,8.0,-7.977995368999999,-0.029934082999999997,True
CNAG_06930,"TMA7 Protein of unknown that associates with ribosomes; null mutant exhibits translation defects, altered polyribosome profiles, and resistance to the translation inhibitor anisomcyin; protein abundance increases in response to DNA replication stress",,505.0,2.0,-7.980139577999999,-0.030498052,True
CNAG_02497,thaumatin family protein    PF00314.9 Thaumatin,,762.0,3.0,-7.988684687,-0.032745586,True
CNAG_03873,conserved hypothetical protein    PF02755.7 RPEL,,1779.0,7.0,-7.989495872999999,-0.032958944,True
CNAG_06661,conserved hypothetical protein    PF04212.10 MIT,,1272.0,5.0,-7.99095486,-0.033342686,True
CNAG_00483,"ACT1 Actin, structural protein involved in cell polarization, endocytosis, and other cytoskeletal functions",ACT1(Actin),1019.0,4.0,-7.992938336,-0.03386438,True
CNAG_01082,conserved hypothetical protein    PF00023.22 Ank,,510.0,2.0,-7.994353437000001,-0.034236578999999996,True
CNAG_05309,conserved hypothetical protein,,510.0,2.0,-7.994353437000001,-0.034236578999999996,True
CNAG_02488,methionyl-tRNA formyltransferase,,1023.0,4.0,-7.99859043,-0.035350992000000005,True
CNAG_06895,conserved hypothetical protein,,513.0,2.0,-8.002815016,-0.036462142,True
CNAG_04741,EAR1 Specificity factor required for Rsp5p-dependent ubiquitination and sorting of specific cargo proteins at the multivesicular body; mRNA is targeted to the bud via the mRNA transport system involving She2p,,515.0,2.0,-8.008428622,-0.037938632,True
CNAG_04473,conserved hypothetical protein,,2066.0,8.0,-8.012624538999999,-0.039042241,True
CNAG_05912,conserved hypothetical protein    PF04082.10 Fungal_trans,,1035.0,4.0,-8.015415052,-0.039776202000000004,True
CNAG_04343,nicotinamide mononucleotide permease    PF07690.8 MFS_1,,259.0,1.0,-8.016808288,-0.04014265,True
CNAG_04349,conserved hypothetical protein    PF01553.13 Acyltransferase,,259.0,1.0,-8.016808288,-0.04014265,True
CNAG_06541,conserved hypothetical protein    PF01490.10 Aa_trans,,777.0,3.0,-8.016808288,-0.04014265,True
CNAG_03411,conserved hypothetical protein,,521.0,2.0,-8.025139562,-0.04233394099999999,True
CNAG_01504,SYS1 Integral membrane protein of the Golgi required for targeting of the Arf-like GTPase Arl3p to the Golgi; multicopy suppressor of ypt6 null mutation,,261.0,1.0,-8.027905997000001,-0.043061568,True
CNAG_04836,nuclear protein    PF00172.10 Zn_clus PF04082.10 Fungal_trans,,789.0,3.0,-8.038918988999999,-0.045958202999999996,True
CNAG_02361,FEN2 Plasma membrane H+-pantothenate symporter; confers sensitivity to the antifungal agent fenpropimorph,,2368.0,9.0,-8.039528364,-0.046118480999999996,True
CNAG_02365,AMD2 Putative amidase,,2107.0,8.0,-8.040974599,-0.046498869000000005,True
CNAG_03067,pyruvate carboxyltransferase    PF00682.11 HMGL-like,,1054.0,4.0,-8.041659152000001,-0.04667892,True
CNAG_00420,conserved hypothetical protein    PF08285.3 DPM3,,1057.0,4.0,-8.045759661,-0.04775743599999999,True
CNAG_00421,VPS24 One of four subunits of the endosomal sorting complex required for transport III (ESCRT-III); forms an ESCRT-III subcomplex with Did4p; involved in the sorting of transmembrane proteins into the multivesicular body (MVB) pathway,,1057.0,4.0,-8.045759661,-0.04775743599999999,True
CNAG_05430,conserved hypothetical protein,,265.0,1.0,-8.049848549,-0.048832894,True
CNAG_02230,phosphoketolase    PF03894.7 XFP PF09363.2 XFP_C PF09364.2 XFP_N,,1594.0,6.0,-8.053473412999999,-0.049786305999999995,True
CNAG_02123,"FMT1 Methionyl-tRNA formyltransferase, catalyzes the formylation of initiator Met-tRNA in mitochondria; potential Cdc28p substrate",,799.0,3.0,-8.057089192000001,-0.050737327,True
CNAG_03479,conserved hypothetical protein,,1072.0,4.0,-8.06608919,-0.053104505,True
CNAG_01065,conserved hypothetical protein    PF03659.6 Glyco_hydro_71,,2424.0,9.0,-8.073248982,-0.054987672,True
CNAG_00452,isovaleryl-CoA dehydrogenase 2    PF00441.16 Acyl-CoA_dh_1 PF02770.11 Acyl-CoA_dh_M PF02771.8 Acyl-CoA_dh_N PF08028.3 Acyl-CoA_dh_2,,539.0,2.0,-8.074141463,-0.055222412,True
CNAG_00020,conserved hypothetical protein,,540.0,2.0,-8.076815597000001,-0.055925762999999996,True
CNAG_04785,conserved hypothetical protein    PF03992.8 ABM PF07876.4 Dabb,,818.0,3.0,-8.090994532,-0.059655104,True
CNAG_07752,UDP-galactopyranose mutase,"GLF(UDP-Galactopyranose Mutase, with confirmed enzymatic function)",820.0,3.0,-8.094517599,-0.06058174,True
CNAG_05187,conserved hypothetical protein,,274.0,1.0,-8.098032083,-0.061506119000000005,True
CNAG_04864,CIR1 GATA-type transcription factor,CIR1(GATA-type transcription factor),1644.0,6.0,-8.098032083,-0.061506119000000005,True
CNAG_01545,conserved hypothetical protein    PF06380.3 DUF1072 PF07690.8 MFS_1,,275.0,1.0,-8.103287808,-0.062888479,True
CNAG_06153,RPT5 One of six ATPases of the 19S regulatory particle of the 26S proteasome involved in the degradation of ubiquitinated substrates; recruited to the GAL1-10 promoter region upon induction of transcription; similar to human TBP1,,276.0,1.0,-8.108524457,-0.064265822,True
CNAG_06154,"YKL047W Putative protein of unknown function, predicted to be palmitoylated; green fluorescent protein (GFP)-fusion protein localizes to the cytoplasm",,276.0,1.0,-8.108524457,-0.064265822,True
CNAG_01117,elongation factor 3    PF00005.19 ABC_tran PF00385.16 Chromo PF02985.14 HEAT,EF3(Elongation factor 3),552.0,2.0,-8.108524457,-0.064265822,True
CNAG_05620,conserved hypothetical protein,,830.0,3.0,-8.112005026,-0.06518128,True
CNAG_03763,"IQG1 Essential protein required for determination of budding pattern, promotes localization of axial markers Bud4p and Cdc12p and functionally interacts with Sec3p, localizes to the contractile ring during anaphase, member of the IQGAP family",,554.0,2.0,-8.113742166,-0.065638183,True
CNAG_00038,alcohol dehydrogenase    PF00107.18 ADH_zinc_N PF08240.4 ADH_N,,831.0,3.0,-8.113742166,-0.065638183,True
CNAG_04291,glycosyl-hydrolase,,560.0,2.0,-8.129283017,-0.069725735,True
CNAG_05053,conserved hypothetical protein    PF00807.9 Apidaecin,,848.0,3.0,-8.142957954,-0.073322514,True
CNAG_03040,transketolase    PF02780.12 Transketolase_C,,2545.0,9.0,-8.14352494,-0.073471643,True
CNAG_05106,YLR281C Putative protein of unknown function; green fluorescent protein (GFP)-fusion protein localizes to mitochondria; YLR281C is not an essential gene,,283.0,1.0,-8.144658243,-0.07376972400000001,True
CNAG_03168,"MET10 Subunit alpha of assimilatory sulfite reductase, which converts sulfite into sulfide",,4534.0,16.0,-8.146568676000001,-0.074272206,True
CNAG_07375,guanyl-nucleotide exchange factor    VPS9 Vacuolar sorting protein 9 (VPS9) domain,,284.0,1.0,-8.14974712,-0.0751082,True
CNAG_07778,SUI2 Alpha subunit of the translation initiation factor eIF2; eIF2 is involved in identification of the start codon; phosphorylation of Ser51 is required for regulation of translation by inhibiting the exchange of GDP for GTP; protein abundance increases in response to DNA replication stress,,284.0,1.0,-8.14974712,-0.0751082,True
CNAG_02797,CPL1(VC) Potential secreted protein of unknown function,CPL1(Potential secreted protein; mutant shows decreased lung infectivity in competitive STM infection and decreased capsule formation),286.0,1.0,-8.159871337,-0.077771069,True
CNAG_01011,conserved hypothetical protein,,287.0,1.0,-8.164906927,-0.079095529,True
CNAG_01150,delta-12 fatty acid desaturase    PF00487.16 FA_desaturase,,287.0,1.0,-8.164906927,-0.079095529,True
CNAG_00162,alternative oxidase    PF01786.9 AOX,"AOX1(mutant sensitive to inhibitors of cytochrome oxidative pathway and oxidative stressors, attenuated in a mouse model and impaired growth in macrophage cell line)AOX1(Alternative oxidase)",3734.0,13.0,-8.166066493999999,-0.079400519,True
CNAG_05078,"RIT1 2'-O-ribosyl phosphate transferase, modifies the initiator methionine tRNA at position 64 to distinguish it from elongator methionine tRNA",,2011.0,7.0,-8.166342444,-0.079473099,True
CNAG_01295,acyl carrier    PF00550.17 PP-binding,,1153.0,4.0,-8.171176798,-0.08074463,True
CNAG_06213,conserved hypothetical protein    PF05345.4 He_PIG,,865.0,3.0,-8.171593822,-0.080854315,True
CNAG_07532,"PHO23 Probable component of the Rpd3 histone deacetylase complex, involved in transcriptional regulation of PHO5; affects termination of snoRNAs and cryptic unstable transcripts (CUTs); C-terminus has similarity to human candidate tumor suppressor p33(ING1) and its isoform ING3",,289.0,1.0,-8.174925683,-0.081730661,True
CNAG_00078,YGR125W Putative protein of unknown function; deletion mutant has decreased rapamycin resistance but normal wormannin resistance; green fluorescent protein (GFP)-fusion protein localizes to the vacuole,,579.0,2.0,-8.177419537999999,-0.08238659400000001,True
CNAG_00499,"CRC1 Mitochondrial inner membrane carnitine transporter, required for carnitine-dependent transport of acetyl-CoA from peroxisomes to mitochondria during fatty acid beta-oxidation",,869.0,3.0,-8.178249866,-0.082604987,True
CNAG_00500,"PTC1 Type 2C protein phosphatase (PP2C); dephosphorylates Hog1p, inactivating osmosensing MAPK cascade; involved in Fus3p activation during pheromone response; deletion affects precursor tRNA splicing, mitochondrial inheritance, and sporulation",,869.0,3.0,-8.178249866,-0.082604987,True
CNAG_04289,conserved hypothetical protein    PF02370.8 M,,870.0,3.0,-8.17990909,-0.08304139599999999,True
CNAG_02681,phytase    PF00328.14 Acid_phosphat_A,,1450.0,5.0,-8.17990909,-0.08304139599999999,True
CNAG_00517,"SHR3 Endoplasmic reticulum packaging chaperone, required for incorporation of amino acid permeases into COPII coated vesicles for transport to the cell surface",,582.0,2.0,-8.184875343,-0.084347619,True
CNAG_06809,IKS1 Protein kinase of unknown cellular role; putative serine/threonine kinase; expression is induced during mild heat stress; deletion mutants are hypersensitive to copper sulphate and resistant to sorbate; interacts with an N-terminal fragment of Sst2p,IKS1(Serine/threonine-protein kinase),3209.0,11.0,-8.188476456,-0.08529478300000001,True
CNAG_05682,"YPR098C Protein of unknown function, localized to the mitochondrial outer membrane",,292.0,1.0,-8.189824559,-0.085649361,True
CNAG_05373,ELP4 Subunit of hexameric RecA-like ATPase Elp456 Elongator subcomplex; which is required for modification of wobble nucleosides in tRNA; required for Elongator structural integrity,,293.0,1.0,-8.194756854,-0.086946652,True
CNAG_00433,conserved hypothetical protein    PF07670.6 Gate PF07690.8 MFS_1,,587.0,2.0,-8.197216693,-0.087593639,True
CNAG_00074,"PNS1 Protein of unknown function; has similarity to Torpedo californica tCTL1p, which is postulated to be a choline transporter, neither null mutation nor overexpression affects choline transport",,2058.0,7.0,-8.199672345,-0.088239524,True
CNAG_06164,conserved hypothetical protein,,890.0,3.0,-8.212699025,-0.091665799,True
CNAG_03190,"CCR4 Component of the CCR4-NOT transcriptional complex, which is involved in regulation of gene expression; component of the major cytoplasmic deadenylase, which is involved in mRNA poly(A) tail shortening",CCR4(Component of the CCR4-NOT transcriptional regulatory complex; major cytoplasmic deadenylase component involved in mRNA poly(A) tail shortening),1784.0,6.0,-8.215937399,-0.092517556,True
CNAG_04326,"MAE1 Mitochondrial malic enzyme, catalyzes the oxidative decarboxylation of malate to pyruvate, which is a key intermediate in sugar metabolism and a precursor for synthesis of several amino acids",,304.0,1.0,-8.247927512999999,-0.10093159,True
CNAG_04130,conserved hypothetical protein    PF00172.10 Zn_clus,,1524.0,5.0,-8.251719093,-0.101928851,True
CNAG_04143,conserved hypothetical protein,,8877.0,29.0,-8.257875487,-0.103548104,True
CNAG_03987,"HBS1 GTPase with similarity to translation release factors; together with binding partner Dom34p, facilitates ribosomal subunit dissociation and peptidyl-tRNA release when translation is stalled; genetically implicated in mRNA no-go decay",,1226.0,4.0,-8.259743263999999,-0.104039367,True
CNAG_03409,SKN7(V),"Skn7(Response regulator mediating response to oxidative and Na+ stress, mutant has attenuated virulence)SKN7 (SKN702)(Reponse regulator and transcription factor; two-component signaling pathway; role in oxidative stress response)",924.0,3.0,-8.266786541,-0.105891888,True
CNAG_03408,conserved hypothetical protein,,926.0,3.0,-8.269905883,-0.10671233699999999,True
CNAG_06808,"STE3 Receptor for a factor pheromone, couples to MAP kinase cascade to mediate pheromone response; transcribed in alpha cells and required for mating by alpha cells, ligand bound receptors endocytosed and recycled to the plasma membrane; GPCR",Ste3alpha(Pheremone receptor)STE3Alpha(Mating type a pheremon receptor)CPRalpha(a-factor pheromone receptor),619.0,2.0,-8.273795599,-0.10773541,True
CNAG_04751,conserved hypothetical protein,,310.0,1.0,-8.276124405,-0.108347932,True
CNAG_05397,conserved hypothetical protein,,311.0,1.0,-8.28077077,-0.109570018,True
CNAG_05178,conserved hypothetical protein    PF00153.19 Mito_carr,,933.0,3.0,-8.28077077,-0.109570018,True
CNAG_05179,"QCR2 Subunit 2 of the ubiquinol cytochrome-c reductase complex, which is a component of the mitochondrial inner membrane electron transport chain; phosphorylated; transcription is regulated by Hap1p, Hap2p/Hap3p, and heme",,933.0,3.0,-8.28077077,-0.109570018,True
CNAG_07405,predicted protein,,4999.0,16.0,-8.287423812,-0.11131989999999999,True
CNAG_05033,conserved hypothetical protein,,3453.0,11.0,-8.294203,-0.113102961,True
CNAG_07348,phosphopantothenoylcysteine decarboxylase    Flavoprotein Flavoprotein,,315.0,1.0,-8.299208018,-0.11441938,True
CNAG_07517,conserved hypothetical protein,,315.0,1.0,-8.299208018,-0.11441938,True
CNAG_06424,claudin family protein,,2205.0,7.0,-8.299208018,-0.11441938,True
CNAG_00683,"KNS1 Protein kinase involved in negative regulation of PolIII transcription; effector kinase of the TOR signaling pathway and phosphorylates Rpc53p to regulate ribosome and tRNA biosynthesis; member of the LAMMER family of protein kinases, which are serine/threonine kinases also capable of phosphorylating tyrosine residues; capable of autophosphorylation",,946.0,3.0,-8.300733872999999,-0.11482071,True
CNAG_06920,UBP3 Ubiquitin-specific protease involved in transport and osmotic response; interacts with Bre5p to co-regulate anterograde and retrograde transport between the ER and Golgi; involved in transcription elongation in response to osmostress through phosphorylation at Ser695 by Hog1p; inhibitor of gene silencing; cleaves ubiquitin fusions but not polyubiquitin; also has mRNA binding activity; protein abundance increases in response to DNA replication stress,,1579.0,5.0,-8.302867361,-0.11538186,True
CNAG_04897,conserved hypothetical protein,,636.0,2.0,-8.312882955,-0.11801616,True
CNAG_04898,MFS transporter    PF07690.8 MFS_1,,636.0,2.0,-8.312882955,-0.11801616,True
CNAG_06145,"PET127 Protein with a role in 5'-end processing of mitochondrial RNAs, located in the mitochondrial membrane",,1913.0,6.0,-8.316658658,-0.119009244,True
CNAG_04974,conserved hypothetical protein,,3197.0,10.0,-8.320574934,-0.12003930300000001,True
CNAG_04268,APN2 Class II abasic (AP) endonuclease involved in repair of DNA damage; homolog of human HAP1 and E. coli exoIII,,2562.0,8.0,-8.32305476,-0.120691546,True
CNAG_00531,ENA2(V) Sodium pump,ENA1(ENA2)(P-type ATPase sodium pump; mutant shows decreased lung infectivity in competitive STM infection),965.0,3.0,-8.329422631,-0.12236642199999999,True
CNAG_02603,early growth response protein 1    PF00096.18 zf-C2H2 PF04082.10 Fungal_trans,,9385.0,29.0,-8.338160035,-0.12466453300000001,True
CNAG_06411,mutanase    PF03659.6 Glyco_hydro_71,?(Putative secreted protein controlled by Znf2),971.0,3.0,-8.338364985,-0.124718439,True
CNAG_04920,galactose transporter    PF00083.16 Sugar_tr PF07690.8 MFS_1,"Snf3(Sensor of extracellular glucose, resembles transporter, homology to galactose transporter)",3567.0,11.0,-8.341063882,-0.125428302,True
CNAG_06629,conserved hypothetical protein,,1630.0,5.0,-8.348728154,-0.127444158,True
CNAG_02720,GTP-binding protein    PF01926.15 MMR_HSR1 PF08701.3 GN3L_Grn1,,983.0,3.0,-8.356085106,-0.12937918199999998,True
CNAG_06169,"R,R    PF00107.18 ADH_zinc_N PF08240.4 ADH_N",,329.0,1.0,-8.361943774,-0.130920128,True
CNAG_07691,hypothetical protein,,1317.0,4.0,-8.36303963,-0.13120836,True
CNAG_02694,conserved hypothetical protein    PF00652.14 Ricin_B_lectin,,1322.0,4.0,-8.368506462000001,-0.132646245,True
CNAG_03288,"TMS1 Vacuolar membrane protein of unknown function that is conserved in mammals; predicted to contain eleven transmembrane helices; interacts with Pdr5p, a protein involved in multidrug resistance",,6612.0,20.0,-8.368942914,-0.132761041,True
CNAG_05419,conserved hypothetical protein,,666.0,2.0,-8.379378367000001,-0.135505772,True
CNAG_00466,adaptin ear-binding coat-associated protein 2    PF07933.6 DUF1681,,1667.0,5.0,-8.381110293999999,-0.135961303,True
CNAG_02255,BNR/Asp-box repeat family protein    PF02012.12 BNR,,2004.0,6.0,-8.383704292000001,-0.136643576,True
CNAG_02044,conserved hypothetical protein,,5353.0,16.0,-8.386131937,-0.137282095,True
CNAG_04371,HSV2(V) WD40 protein related to 3-phosphorylated inositide-binding protein,HSV2(WD40 protein related to 3-phosphorylated inositide-binding protein; mutant shows decreased lung infectivity in competitive STM infection),336.0,1.0,-8.392317423,-0.138909,True
CNAG_07399,conserved hypothetical protein,,2352.0,7.0,-8.392317423,-0.138909,True
CNAG_03499,twin-arginine translocation pathway signal    PF00557.16 Peptidase_M24,,1689.0,5.0,-8.400025518,-0.140936382,True
CNAG_03676,D-lactate dehydrogenase    PF01565.15 FAD_binding_4 PF02913.11 FAD-oxidase_C,,339.0,1.0,-8.405141463,-0.142281977,True
CNAG_06594,"KES1 Member of the oxysterol binding protein family, which includes seven yeast homologs; involved in negative regulation of Sec14p-dependent Golgi complex secretory functions, peripheral membrane protein that localizes to the Golgi complex",,679.0,2.0,-8.407267764,-0.14284123599999998,True
CNAG_07473,VAS1 Mitochondrial and cytoplasmic valyl-tRNA synthetase,,340.0,1.0,-8.409390936,-0.143399672,True
CNAG_03816,"PRE3 Beta 1 subunit of the 20S proteasome, responsible for cleavage after acidic residues in peptides",,1702.0,5.0,-8.411087227000001,-0.143845831,True
CNAG_05025,amine oxidase    PF01593.16 Amino_oxidase,,2389.0,7.0,-8.414836216,-0.144831889,True
CNAG_00864,myo-inositol transporter    PF00083.16 Sugar_tr PF07690.8 MFS_1,Itr2(Inositol tranporter)ITR2(Myo-inositol transporter),1709.0,5.0,-8.417008587,-0.145403266,True
CNAG_01282,"IMH1 Protein involved in vesicular transport, mediates transport between an endosomal compartment and the Golgi, contains a Golgi-localization (GRIP) domain that interacts with activated Arl1p-GTP to localize Imh1p to the Golgi",,690.0,2.0,-8.430452552,-0.148939295,True
CNAG_03764,integral membrane protein    PF04193.6 PQ-loop,,346.0,1.0,-8.434628228,-0.150037581,True
CNAG_00098,palmitoyl-protein thioesterase    PF02089.7 Palm_thioest,,1391.0,4.0,-8.441906705,-0.151951964,True
CNAG_05743,"DOC1 Processivity factor required for the ubiquitination activity of the anaphase promoting complex (APC), mediates the activity of the APC by contributing to substrate recognition; involved in cyclin proteolysis; contains a conserved DOC1 homology domain",,348.0,1.0,-8.442943496,-0.15222466099999998,True
CNAG_00076,A/G-specific adenine DNA glycosylase    PF00633.15 HHH PF00730.17 HhH-GPD,,4189.0,12.0,-8.447427668,-0.153404087,True
CNAG_01051,dynactin    PF01302.17 CAP_GLY,,3864.0,11.0,-8.45644776,-0.15577655,True
CNAG_00028,high-affinity nicotinic acid transporter    PF07690.8 MFS_1,,353.0,1.0,-8.463524373,-0.15763784,True
CNAG_00130,HRK1 Hog1-regulated kinase -Rck1/2 homolog,RCK2(Predicted protein kinase; similar to CaM (calmodulin) kinases; mutant shows increased infectivity in competitive STM infection),1767.0,5.0,-8.46515823,-0.158067577,True
CNAG_03654,ATP dependent DNA helicase    PF00270.21 DEAD PF00271.23 Helicase_C PF07813.4 LTXXQ,,3898.0,11.0,-8.469086757000001,-0.15910085699999998,True
CNAG_00587,conserved hypothetical protein    PF00652.14 Ricin_B_lectin,,19850.0,56.0,-8.469496465,-0.159208619,True
CNAG_05159,CNAG_05159 unknown,,1065.0,3.0,-8.471675214,-0.159781673,True
CNAG_07428,hypothetical protein,,356.0,1.0,-8.475733431,-0.160849064,True
CNAG_03202,CAC1(V),"Cac1(Major regulator of response to CO2-signaling, directly activated by bicarbonate, mutants are viable and of normal morphology (unlike ustilago), mating defective and failed to produce capsule and melanin, avirulent in a mouse model)CAC1(Adenylate cyclase; required for cAMP production and cAMP-dependent protein kinase signaling; mutants are mating defective, lack capsule and melanin and are avirulent in mice)",1783.0,5.0,-8.478162893,-0.161488061,True
CNAG_06055,conserved hypothetical protein,,1071.0,3.0,-8.479780264,-0.16191346199999998,True
CNAG_04196,"ARP2 Essential component of the Arp2/3 complex, which is a highly conserved actin nucleation center required for the motility and integrity of actin patches; involved in endocytosis and membrane growth and polarity",,1437.0,4.0,-8.488844346,-0.164297495,True
CNAG_07402,pantothenate transporter    PF07690.8 MFS_1,,361.0,1.0,-8.495855027000001,-0.166141443,True
CNAG_07631,conserved hypothetical protein    PF03370.5 CBM_21,,1083.0,3.0,-8.495855027000001,-0.166141443,True
CNAG_01939,fmHP,,1445.0,4.0,-8.496853777,-0.166404134,True
CNAG_05180,conserved hypothetical protein    PF00498.18 FHA,,362.0,1.0,-8.499845887000001,-0.167191118,True
CNAG_01746,"ITT1 Protein that modulates the efficiency of translation termination, interacts with translation release factors eRF1 (Sup45p) and eRF3 (Sup35p) in vitro, contains a zinc finger domain characteristic of the TRIAD class of proteins",,363.0,1.0,-8.503825738,-0.168237898,True
CNAG_05383,conserved hypothetical protein    PF01261.16 AP_endonuc_2,,1458.0,4.0,-8.509775004,-0.16980267300000002,True
CNAG_06105,conserved hypothetical protein,,366.0,1.0,-8.515699838,-0.171361022,True
CNAG_06214,YBL029C-A Protein of unknown function; green fluorescent protein (GFP)-fusion protein localizes to the cell periphery; protein abundance increases in response to DNA replication stress; has potential orthologs in Saccharomyces species and in Yarrowia lipolytica,,2564.0,7.0,-8.516825625,-0.17165712600000002,True
CNAG_00418,"SAM1 S-adenosylmethionine synthetase; catalyzes transfer of the adenosyl group of ATP to the sulfur atom of methionine; SAM1 has a paralog, SAM2, that arose from the whole genome duplication",,1100.0,3.0,-8.518325308,-0.172051573,True
CNAG_03856,conserved hypothetical protein,,368.0,1.0,-8.523561956,-0.173428915,True
CNAG_01981,sulfide:quinone oxidoreductase    PF07992.6 Pyr_redox_2,,2586.0,7.0,-8.529151638,-0.174899112,True
CNAG_04393,"SLH1 Putative RNA helicase related to Ski2p, involved in translation inhibition of non-poly(A) mRNAs; required for repressing propagation of dsRNA viruses",,370.0,1.0,-8.531381461,-0.1754856,True
CNAG_03416,conserved hypothetical protein,,371.0,1.0,-8.535275377,-0.17650977699999998,True
CNAG_03420,carboxypeptidase s    PF01546.20 Peptidase_M20 PF07687.6 M20_dimer,,3727.0,10.0,-8.541871009,-0.178244559,True
CNAG_03516,conserved hypothetical protein,,5623.0,15.0,-8.550233736000001,-0.18044412199999998,True
CNAG_00901,"PEX28 Peroxisomal integral membrane peroxin, involved in the regulation of peroxisomal size, number and distribution; genetic interactions suggest that Pex28p and Pex29p act at steps upstream of those mediated by Pex30p, Pex31p, and Pex32p",,375.0,1.0,-8.550746785,-0.18057906399999998,True
CNAG_07475,predicted protein,,1128.0,3.0,-8.554588852,-0.181589604,True
CNAG_04981,catalase A    PF00199.11 Catalase PF01965.16 DJ-1_PfpI PF06628.4 Catalase-rel,?(Peroxisomal catalase)CAT1(Catalase A; regulated by Gcn5),1133.0,3.0,-8.560969645,-0.183267879,True
CNAG_05640,SMF1 NRAMP manganese transporter,,3399.0,9.0,-8.560969645,-0.183267879,True
CNAG_02049,proline dehydrogenase    PF01619.10 Pro_dh,"Put1(Proline Oxidase ortholog, required for virulence, deletion mutant accumulates oxidative species)PUT1(Proline oxidase)",1892.0,5.0,-8.563768278,-0.184003975,True
CNAG_02050,"AQR1 Plasma membrane multidrug transporter of the major facilitator superfamily, confers resistance to short-chain monocarboxylic acids and quinidine; involved in the excretion of excess amino acids",QDR1(MFS multidrug transporter),1892.0,5.0,-8.563768278,-0.184003975,True
CNAG_05833,allantoate transporter    PF07690.8 MFS_1,,757.0,2.0,-8.56414949,-0.184104241,True
CNAG_00480,conserved hypothetical protein,,379.0,1.0,-8.566054037999999,-0.184605175,True
CNAG_01254,protein-tyrosine-phosphatase    PF03162.5 Y_phosphatase2,,379.0,1.0,-8.566054037999999,-0.184605175,True
CNAG_05521,aldose reductase    PF00248.13 Aldo_ket_red,,2279.0,6.0,-8.569222709,-0.185438598,True
CNAG_05899,"PRO3 Delta 1-pyrroline-5-carboxylate reductase, catalyzes the last step in proline biosynthesis",,381.0,1.0,-8.573647187,-0.18660232399999999,True
CNAG_00257,kinesin family member 21A    PF00225.15 Kinesin PF04508.4 Pox_A_type_inc,,3051.0,8.0,-8.575066465,-0.18697562199999998,True
CNAG_01116,beta-ketoacyl reductase    PF00106.17 adh_short,,4203.0,11.0,-8.577772122999999,-0.187687264,True
CNAG_04228,"2,4-dienoyl-CoA reductase    PF00106.17 adh_short",,2691.0,7.0,-8.586571754,-0.190001741,True
CNAG_06554,FAD dependent oxidoreductase superfamily    PF01266.16 DAO,,769.0,2.0,-8.586839787999999,-0.19007224,True
CNAG_01714,sulfonate dioxygenase    PF02668.8 TauD,,385.0,1.0,-8.588714636,-0.190565362,True
CNAG_03638,heterokaryon incompatibility protein HET-C    PF07217.3 Het-C,,770.0,2.0,-8.588714636,-0.190565362,True
CNAG_03967,CAP1 Alpha subunit of the capping protein heterodimer (Cap1p and Cap2p); capping protein (CP) binds to the barbed ends of actin filaments preventing further polymerization; localized predominantly to cortical actin patches; protein abundance increases in response to DNA replication stress,,8865.0,23.0,-8.59034296,-0.19099364300000002,True
CNAG_04538,"ATG7 Autophagy-related protein and dual specificity member of the E1 family of ubiquitin-activating enzymes; mediates the conjugation of Atg12p with Atg5p and Atg8p with phosphatidylethanolamine, required steps in autophagosome formation",,386.0,1.0,-8.592457037,-0.191549688,True
CNAG_05678,"ATO2 Putative transmembrane protein involved in export of ammonia, a starvation signal that promotes cell death in aging colonies; phosphorylated in mitochondria; member of the TC 9.B.33 YaaH family; homolog of Ady2p and Y. lipolytica Gpr1p",,782.0,2.0,-8.611024797,-0.196433377,True
CNAG_03212,fork head domain-containing protein    PF00250.10 Fork_head,,1175.0,3.0,-8.613482541,-0.197079812,True
CNAG_02730,"SNX41 Sorting nexin, involved in the retrieval of late-Golgi SNAREs from the post-Golgi endosome to the trans-Golgi network; interacts with Snx4p",,392.0,1.0,-8.614709844,-0.197402617,True
CNAG_02845,cDNA sequence,,1568.0,4.0,-8.614709844,-0.197402617,True
CNAG_03830,conserved hypothetical protein,,1569.0,4.0,-8.615629637,-0.197644541,True
CNAG_05930,conserved hypothetical protein,,1177.0,3.0,-8.615936104,-0.19772514800000002,True
CNAG_04577,nucleoside-diphosphate kinase    PF00334.11 NDK,,6297.0,16.0,-8.620448952,-0.19891211600000003,True
CNAG_01896,aldehyde reductase I    PF00248.13 Aldo_ket_red,,1182.0,3.0,-8.622051819,-0.199333702,True
CNAG_06544,"NHP6A High-mobility group (HMG) protein, binds to and remodels nucleosomes; involved in recruiting FACT and other chromatin remodelling complexes to chromosomes; functionally redundant with Nhp6Bp; homologous to mammalian HMGB1 and HMGB2; NHP6A has a paralog, NHP6B, that arose from the whole genome duplication; protein abundance increases in response to DNA replication stress",,791.0,2.0,-8.627533884,-0.20077559399999997,True
CNAG_06290,sugar transporter    PF00083.16 Sugar_tr PF07690.8 MFS_1,"Snf3(Sensor of extracellular glucose, resembles transporter)",396.0,1.0,-8.62935662,-0.20125501,True
CNAG_02415,annexin XIV    PF00191.12 Annexin,,792.0,2.0,-8.62935662,-0.20125501,True
CNAG_07540,conserved hypothetical protein,,1986.0,5.0,-8.633721813,-0.20240314199999998,True
CNAG_03084,endoribonuclease L-PSP    PF01042.13 Ribonuc_L-PSP,,797.0,2.0,-8.638435914,-0.203643044,True
CNAG_03275,glutaryl-CoA dehydrogenase    PF00441.16 Acyl-CoA_dh_1 PF02770.11 Acyl-CoA_dh_M PF08028.3 Acyl-CoA_dh_2,,798.0,2.0,-8.640244936,-0.20411885300000002,True
CNAG_06834,"PMT1 Protein O-mannosyltransferase of the ER membrane; transfers mannose from dolichyl phosphate-D-mannose to protein serine and threonine residues; 1 of 7 related proteins involved in O-glycosylation which is essential for cell wall rigidity; involved in ER quality control; amino terminus faces cytoplasm, carboxyl terminus faces ER lumen",PMT1(Dolichyl-phosphate-mannose-protein mannosyltransferase),798.0,2.0,-8.640244936,-0.20411885300000002,True
CNAG_06971,MYO2    PF00063.13 Myosin_head PF00612.19 IQ PF01843.11 DIL,MYO2(Myosin class V heavy chain),799.0,2.0,-8.642051692999999,-0.20459406600000002,True
CNAG_00554,"ISC1 Mitochondrial membrane localized inositol phosphosphingolipid phospholipase C, hydrolyzes complex sphingolipids to produce ceramide; activated by phosphatidylserine, cardiolipin, and phosphatidylglycerol; mediates Na+ and Li+ halotolerance","Isc1(Inositol phosphosphingolipid phospholipase C1, promotes fungal virulence)",400.0,1.0,-8.64385619,-0.20506868399999997,True
CNAG_00663,conserved hypothetical protein,,2804.0,7.0,-8.645915712,-0.20561037899999998,True
CNAG_01752,"ODC1 Mitochondrial inner membrane transporter, exports 2-oxoadipate and 2-oxoglutarate from the mitochondrial matrix to the cytosol for lysine and glutamate biosynthesis and lysine catabolism; suppresses, in multicopy, an fmc1 null mutation",,401.0,1.0,-8.647458426,-0.20601614399999998,True
CNAG_06068,conserved hypothetical protein    PF00439.17 Bromodomain PF01426.10 BAH,,1608.0,4.0,-8.651051691000001,-0.206961244,True
CNAG_02465,allantoate permease    PF07690.8 MFS_1,,2430.0,6.0,-8.661778098,-0.209782501,True
CNAG_05190,conserved hypothetical protein,,1216.0,3.0,-8.662965012999999,-0.210094683,True
CNAG_06811,"RPL22A Ribosomal 60S subunit protein L22A; required for the oxidative stress response in yeast; homologous to mammalian ribosomal protein L22, no bacterial homolog; RPL22A has a paralog, RPL22B, that arose from the whole genome duplication",RPL22alpha(Large subunit ribosomal protein L22e; encoded in MAT locus),408.0,1.0,-8.672425342,-0.212582938,True
CNAG_05889,SH3YL1 protein    PF00018.20 SH3_1 PF04366.4 DUF500 PF07653.9 SH3_2,,409.0,1.0,-8.675957033,-0.21351184199999998,True
CNAG_02684,conserved hypothetical protein,,6139.0,15.0,-8.676897359,-0.213759167,True
CNAG_02805,"NCE103 Carbonic anhydrase; metalloenzyme that catalyzes CO2 hydration to bicarbonate, which is an important metabolic substrate, and protons; not expressed under conditions of high CO2, such as inside a growing colony, but transcription is induced in response to low CO2 levels, such as on the colony surface in ambient air; poorly transcribed under aerobic conditions and at an undetectable level under anaerobic conditions; abundance increases in response to DNA replication stress",CAN1(Beta-type carbonic anhydrase; one of two S. cerevisiae Nce103 orthologs in Cryptococcus; not highly expressed under laboratory conditions),42224.0,103.0,-8.679275107999999,-0.214384562,True
CNAG_04536,nicotinamide mononucleotide permease    PF07690.8 MFS_1,,820.0,2.0,-8.6794801,-0.214438479,True
CNAG_00451,YNL040W Putative protein of unknown function with strong similarity to alanyl-tRNA synthases from Eubacteria; green fluorescent protein (GFP)-fusion protein localizes to the cytoplasm; YNL040W is not an essential gene,,411.0,1.0,-8.682994584,-0.21536285800000002,True
CNAG_05038,conserved hypothetical protein,,4522.0,11.0,-8.683313658,-0.215446781,True
CNAG_04886,conserved hypothetical protein,,1247.0,3.0,-8.699283249,-0.2196471,True
CNAG_06427,conserved hypothetical protein,,832.0,2.0,-8.700439718,-0.21995127399999997,True
CNAG_04880,conserved hypothetical protein,,417.0,1.0,-8.703903573,-0.220862337,True
CNAG_05519,conserved hypothetical protein,,1252.0,3.0,-8.705056346000001,-0.221165539,True
CNAG_06350,conserved hypothetical protein,,1255.0,3.0,-8.708509148,-0.222073694,True
CNAG_07861,conserved hypothetical protein    PF03171.12 2OG-FeII_Oxy,,6333.0,15.0,-8.721782767999999,-0.22556492,True
CNAG_07699,zinc finger family protein    PF00097.17 zf-C3HC4 PF00169.21 PH PF07649.4 C1_3,,845.0,2.0,-8.722807531,-0.22583445300000002,True
CNAG_01007,C2 domain-containing protein    PF00168.22 C2,,423.0,1.0,-8.724513853,-0.226283249,True
CNAG_04617,"OPT2 Oligopeptide transporter; member of the OPT family, with potential orthologs in S. pombe and C. albicans; also plays a role in formation of mature vacuoles",,1270.0,3.0,-8.725650281,-0.22658215199999998,True
CNAG_06664,MVP1 Protein required for sorting proteins to the vacuole; Mvp1p and Vps1p act in concert to promote membrane traffic to the vacuole; participates in transcription initiation and/or early elongation of specific genes; interacts with foot domain of RNA polymerase II; deletion results in abnormal CTD-Ser5 phosphorylation of RNA polymerase II at specific promoter regions; protein abundance increases in response to DNA replication stress,,849.0,2.0,-8.729620744,-0.227626462,True
CNAG_00360,"SNF4 Activating gamma subunit of the AMP-activated Snf1p kinase complex; additional subunits of the complex are Snf1p and a Sip1p/Sip2p/Gal83p family member; activates glucose-repressed genes, represses glucose-induced genes; role in sporulation, and peroxisome biogenesis; protein abundance increases in response to DNA replication stress",,2548.0,6.0,-8.730187062,-0.227775415,True
CNAG_00241,arginine methyltransferase-interacting ring finger protein    PF00098.15 zf-CCHC,,7657.0,18.0,-8.732638541,-0.22842020300000002,True
CNAG_04992,conserved hypothetical protein    PF04886.4 PT,,426.0,1.0,-8.73470962,-0.228964938,True
CNAG_03663,L-lactate dehydrogenase    PF00173.20 Cyt-b5 PF01070.10 FMN_dh,,1282.0,3.0,-8.739218046,-0.23015074300000002,True
CNAG_05991,glycosyl hydrolase family 88,,858.0,2.0,-8.744833837,-0.23162780800000002,True
CNAG_01342,NUP42 FG-nucleoporin component of central core of the nuclear pore complex (NPC); also part of the NPC cytoplasmic filaments; contributes directly to nucleocytoplasmic transport and maintenance of the NPC permeability barrier and is involved in gene tethering at the nuclear periphery; interacts with Gle1p,,3025.0,7.0,-8.755364505,-0.234397582,True
CNAG_01027,UGA2 Succinate semialdehyde dehydrogenase involved in the utilization of gamma-aminobutyrate (GABA) as a nitrogen source; part of the 4-aminobutyrate and glutamate degradation pathways; localized to the cytoplasm,,2598.0,6.0,-8.758223215,-0.23514948,True
CNAG_02210,TRZ1 tRNA 3'-end processing endonuclease tRNase Z; also localized to mitochondria and interacts genetically with Rex2 exonuclease; homolog of the human candidate prostate cancer susceptibility gene ELAC2,,6500.0,15.0,-8.759333407,-0.23544148199999998,True
CNAG_01483,conserved hypothetical protein    PF00097.17 zf-C3HC4,,436.0,1.0,-8.768184325,-0.237769449,True
CNAG_07648,predicted protein,,16641.0,38.0,-8.774526997,-0.239437698,True
CNAG_01695,conserved hypothetical protein,,2632.0,6.0,-8.776981272999999,-0.240083221,True
CNAG_00964,conserved hypothetical protein,,2636.0,6.0,-8.779172154,-0.24065946600000002,True
CNAG_02469,"YNR029C Putative protein of unknown function, deletion confers reduced fitness in saline",,1765.0,4.0,-8.785452467999999,-0.242311313,True
CNAG_04787,membrane protein,,7512.0,17.0,-8.787518506,-0.242854722,True
CNAG_04950,"YIP3 Protein localized to COPII vesicles, proposed to be involved in ER to Golgi transport; interacts with members of the Rab GTPase family and Yip1p; also interacts with Rtn1p",,442.0,1.0,-8.787902558999999,-0.242955736,True
CNAG_05916,conserved hypothetical protein,,1328.0,3.0,-8.790076931,-0.243527639,True
CNAG_04587,conserved hypothetical protein,,5813.0,13.0,-8.804627475,-0.24735472,True
CNAG_03707,efflux protein    PF05433.7 Rick_17kDa_Anti PF07690.8 MFS_1,,1345.0,3.0,-8.808427957000001,-0.248354322,True
CNAG_00260,transformer-2-beta isoform 3    PF00076.14 RRM_1 PF08705.3 Gag_p6,,450.0,1.0,-8.813781191,-0.24976232899999998,True
CNAG_02734,conserved hypothetical protein,,3608.0,8.0,-8.816983622999999,-0.250604632,True
CNAG_06384,"RAD50 Subunit of MRX complex, with Mre11p and Xrs2p, involved in processing double-strand DNA breaks in vegetative cells, initiation of meiotic DSBs, telomere maintenance, and nonhomologous end joining",,1357.0,3.0,-8.821242505,-0.251724803,True
CNAG_05003,"AIM6 Putative protein of unknown function, required for respiratory growth; YDL237W is not an essential gene",,12697.0,28.0,-8.82484512,-0.252672362,True
CNAG_03145,predicted protein,,3636.0,8.0,-8.828136484,-0.253538056,True
CNAG_04735,CNJ1810 metalloprotease,?(Metalloprotease found secreted/bound to cell wall)MEP1(Metalloprotease),456.0,1.0,-8.832890014,-0.254788329,True
CNAG_04794,spermine transporter    PF07690.8 MFS_1,,456.0,1.0,-8.832890014,-0.254788329,True
CNAG_07552,DNA repair protein rad8    PF00271.23 Helicase_C PF00385.16 Chromo PF07649.4 C1_3,,457.0,1.0,-8.836050355,-0.255619561,True
CNAG_03412,CTS202 chitinase,CHI2(Endochitinase),459.0,1.0,-8.842350343,-0.257276583,True
CNAG_04319,conserved hypothetical protein,,459.0,1.0,-8.842350343,-0.257276583,True
CNAG_07347,heat shock protein    AAA ATPase family associated with various cellular activities (AAA) AAA_2 ATPase family associated with various cellular activities (AAA) AAA_5 ATPase family associated with various cellular activities (AAA),,1378.0,3.0,-8.843397672,-0.257552051,True
CNAG_00572,RAD3 5' to 3' DNA helicase; involved in nucleotide excision repair and transcription; subunit of RNA polII initiation factor TFIIH and of Nucleotide Excision Repair Factor 3 (NEF3); homolog of human XPD protein; mutant has aneuploidy tolerance; protein abundance increases in response to DNA replication stress,,925.0,2.0,-8.853309555,-0.260159073,True
CNAG_01851,conserved hypothetical protein,,927.0,2.0,-8.856425529,-0.26097863600000004,True
CNAG_01852,"CDC36 Component of the CCR4-NOT complex, which has multiple roles in regulating mRNA levels including regulation of transcription and destabilizing mRNAs by deadenylation; basal transcription factor",,927.0,2.0,-8.856425529,-0.26097863600000004,True
CNAG_05964,Poly(3-hydroxybutyrate) depolymerase,,1854.0,4.0,-8.856425529,-0.26097863600000004,True
CNAG_03719,conserved hypothetical protein    PF07690.8 MFS_1,,1397.0,3.0,-8.863153805,-0.26274830600000004,True
CNAG_03971,conserved hypothetical protein,,1407.0,3.0,-8.873444113,-0.26545486100000004,True
CNAG_05895,"CFT1 RNA-binding subunit of the mRNA cleavage and polyadenylation factor; involved in poly(A) site recognition and required for both pre-mRNA cleavage and polyadenylation, 51% sequence similarity with mammalian AAUAA-binding subunit of CPSF",,2351.0,5.0,-8.877130729,-0.266424514,True
CNAG_00559,conserved hypothetical protein    PF00170.13 bZIP_1 PF07716.7 bZIP_2,,6583.0,14.0,-8.87717456,-0.266436043,True
CNAG_06595,conserved hypothetical protein,,1414.0,3.0,-8.880603903999999,-0.267338028,True
CNAG_07493,conserved hypothetical protein,,472.0,1.0,-8.882643049,-0.267874364,True
CNAG_04457,conserved hypothetical protein    PF00172.10 Zn_clus PF02178.11 AT_hook,,475.0,1.0,-8.891783703,-0.270278537,True
CNAG_01703,conserved hypothetical protein,,953.0,2.0,-8.896332403999999,-0.271474935,True
CNAG_05018,conserved hypothetical protein,,4293.0,9.0,-8.897845456,-0.27187289800000003,True
CNAG_03841,conserved hypothetical protein,,2393.0,5.0,-8.902676587,-0.273143581,True
CNAG_01008,FMP30 Mitochondrial inner membrane protein with a role in maintaining mitochondrial morphology and normal cardiolipin levels; proposed to be involved in N-acylethanolamine metabolism; related to mammalian N-acylPE-specific phospholipase D,,479.0,1.0,-8.903881846,-0.273460588,True
CNAG_04462,"HRT3 Putative SCF-ubiquitin ligase F-box protein, based on both genetic and physical interactions and sequence similarity; identified in association with Cdc53p, Skp1p and Ubi4 in large and small-scale studies",,959.0,2.0,-8.905387005,-0.273856475,True
CNAG_03007,conserved hypothetical protein,,1921.0,4.0,-8.907641803999999,-0.274449532,True
CNAG_01706,predicted protein,,6766.0,14.0,-8.91673254,-0.276840576,True
CNAG_04224,"PSR2 Functionally redundant Psr1p homolog, a plasma membrane phosphatase involved in the general stress response; required with Psr1p and Whi2p for full activation of STRE-mediated gene expression, possibly through dephosphorylation of Msn2p",,3887.0,8.0,-8.924441392,-0.278868157,True
CNAG_00429,"DUS1 Dihydrouridine synthase, member of a widespread family of conserved proteins including Smm1p, Dus3p, and Dus4p; modifies pre-tRNA(Phe) at U17",,487.0,1.0,-8.927777962,-0.279745741,True
CNAG_00446,predicted protein,,976.0,2.0,-8.930737338,-0.280524115,True
CNAG_01969,zinc metalloprotease    PF00200.15 Disintegrin,,6912.0,14.0,-8.94753258,-0.284941597,True
CNAG_01421,HPF1 Haze-protective mannoprotein that reduces the particle size of aggregated proteins in white wines,,2963.0,6.0,-8.94788041,-0.285033083,True
CNAG_03913,conserved hypothetical protein    PF01428.8 zf-AN1,,991.0,2.0,-8.952741247,-0.28631158,True
CNAG_03559,allantoate permease    PF07690.8 MFS_1,,2977.0,6.0,-8.954681006,-0.286821775,True
CNAG_07921,conserved hypothetical protein    PF00172.10 Zn_clus PF04082.10 Fungal_trans,,994.0,2.0,-8.957102042,-0.287458555,True
CNAG_03794,endoplasmic reticulum protein,,498.0,1.0,-8.960001932,-0.28822128399999997,True
CNAG_04850,conserved hypothetical protein,,1998.0,4.0,-8.964340867999999,-0.28936251,True
CNAG_02187,"YIP4 Protein that interacts with Rab GTPases, localized to late Golgi vesicles; computational analysis of large-scale protein-protein interaction data suggests a possible role in vesicle-mediated transport",,1515.0,3.0,-8.980139578,-0.293517884,True
CNAG_05819,conserved hypothetical protein    PF02178.11 AT_hook,,506.0,1.0,-8.982993575,-0.29426854199999997,True
CNAG_04374,conserved hypothetical protein,Cbg2(Beta-glucoronidase involved in breakdown of complex polysaccharides (and regulated by inositol)),1016.0,2.0,-8.988684687000001,-0.295765417,True
CNAG_00094,NAD-dependent epimerase/dehydratase    PF01370.13 Epimerase,,2543.0,5.0,-8.990387652,-0.296213331,True
CNAG_02056,conserved hypothetical protein,,509.0,1.0,-8.991521846,-0.296511646,True
CNAG_06029,YOL114C Putative protein of unknown function with similarity to human ICT1 and prokaryotic factors that may function in translation termination; YOL114C is not an essential gene,,509.0,1.0,-8.991521846,-0.296511646,True
CNAG_03626,actin cross-linking    PF00400.24 WD40 PF01011.13 PQQ PF08954.3 DUF1900,,511.0,1.0,-8.997179481,-0.297999717,True
CNAG_04496,rab GTPase activator    PF00566.10 TBC PF07653.9 SH3_2,,1025.0,2.0,-9.001408194,-0.299111952,True
CNAG_00521,"MCH1 Protein with similarity to mammalian monocarboxylate permeases, which are involved in transport of monocarboxylic acids across the plasma membrane; mutant is not deficient in monocarboxylate transport",,516.0,1.0,-9.011227255,-0.30169456,True
CNAG_06237,YeeE/YedE family protein    PF04143.6 DUF395,,1034.0,2.0,-9.01402047,-0.302429231,True
CNAG_04461,HFM1 Meiosis specific DNA helicase involved in the conversion of double-stranded breaks to later recombination intermediates and in crossover control; catalyzes the unwinding of Holliday junctions; has ssDNA and dsDNA stimulated ATPase activity,HFM1(ATP-dependent DNA helicase),15628.0,30.0,-9.024954945,-0.305305214,True
CNAG_02334,conserved hypothetical protein,,1043.0,2.0,-9.026523443,-0.30571776,True
CNAG_05667,myo-inositol transporter 1    PF00083.16 Sugar_tr PF07690.8 MFS_1,Itr3b1(Inositol transporter)ITR3B(Myo-inositol transporter),522.0,1.0,-9.027905997000001,-0.3060814,True
CNAG_01727,Hsc70-4    PF00012.12 HSP70 PF09373.2 PMBR,,1049.0,2.0,-9.034798963,-0.307894386,True
CNAG_04475,conserved hypothetical protein    PF00300.14 PGAM,,2629.0,5.0,-9.038370332000001,-0.308833727,True
CNAG_04186,conserved hypothetical protein,,3171.0,6.0,-9.045759661,-0.31077726699999997,True
CNAG_03918,conserved hypothetical protein    PF00560.25 LRR_1,SOG2(Component of the RAM signaling network; required for normal cell morphogenesis; mutant shows hyperpolarized pattern of growth),6886.0,13.0,-9.049010747,-0.311632368,True
CNAG_03295,PIG2 Putative type-1 protein phosphatase targeting subunit that tethers Glc7p type-1 protein phosphatase to Gsy2p glycogen synthase,,1063.0,2.0,-9.053925882,-0.312925145,True
CNAG_03901,"MFM1 Mitochondrial inner membrane magnesium transporter, involved in maintenance of mitochondrial magnesium concentrations and membrane potential; indirectly affects splicing of group II introns; functionally and structurally related to Mrs2p",,1598.0,3.0,-9.057089192000001,-0.313757159,True
CNAG_02903,zinc-type alcohol dehydrogenase    PF00107.18 ADH_zinc_N PF08240.4 ADH_N,,535.0,1.0,-9.063395081,-0.31541573300000003,True
CNAG_07862,"OSM1 Fumarate reductase, catalyzes the reduction of fumarate to succinate, required for the reoxidation of intracellular NADH under anaerobic conditions; mutations cause osmotic sensitivity",,4282.0,8.0,-9.06406908,-0.315593008,True
CNAG_03963,"OCA1 Putative protein tyrosine phosphatase, required for cell cycle arrest in response to oxidative damage of DNA",,1074.0,2.0,-9.068778278,-0.31683162,True
CNAG_02955,conserved hypothetical protein,,2155.0,4.0,-9.073472154,-0.318066203,True
CNAG_05387,galactose transporter    PF00083.16 Sugar_tr PF07690.8 MFS_1,"Snf3(Sensor of extracellular glucose, resembles transporter, homology to galactose transporter)",2697.0,5.0,-9.075211711,-0.318523741,True
CNAG_02947,"SCY1 Putative kinase, suppressor of GTPase mutant, similar to bovine rhodopsin kinase",,540.0,1.0,-9.076815597000001,-0.318945594,True
CNAG_06500,"ARG82 Inositol polyphosphate multikinase (IPMK), sequentially phosphorylates Ins(1,4,5)P3 to form Ins(1,3,4,5,6)P5; also has diphosphoinositol polyphosphate synthase activity; regulates arginine-, phosphate-, and nitrogen-responsive genes",,1080.0,2.0,-9.076815597000001,-0.318945594,True
CNAG_00978,NADH dehydrogenase,,2161.0,4.0,-9.077483357,-0.31912122800000003,True
CNAG_05654,RIM9 Plasma membrane protein of unknown function; involved in the proteolytic activation of Rim101p in response to alkaline pH; interacts with Rim21p and Dfg16p to form a pH-sensing complex in the Rim101 pathway and is required to maintain Rim21p levels; has similarity to A. nidulans PalI;,,542.0,1.0,-9.082149041000001,-0.32034839600000004,True
CNAG_06898,"CHS7 Protein of unknown function, involved in chitin biosynthesis by regulating Chs3p export from the ER",Chs3(Chitin synthase important for cell wall stability),1635.0,3.0,-9.09011242,-0.32244292199999997,True
CNAG_07520,endopeptidase    PF00026.15 Asp,,3288.0,6.0,-9.098032083,-0.32452595100000003,True
CNAG_02091,NAP1 Protein that interacts with mitotic cyclin Clb2p; required for the regulation of microtubule dynamics during mitosis; controls bud morphogenesis; involved in the transport of H2A and H2B histones to the nucleus; phosphorylated by CK2; protein abundance increases in response to DNA replication stress,,2753.0,5.0,-9.1048608,-0.326322039,True
CNAG_04341,RCY1 F-box protein involved in recycling plasma membrane proteins internalized by endocytosis; localized to sites of polarized growth,,553.0,1.0,-9.11113567,-0.32797245399999997,True
CNAG_04834,MFS transporter    PF07690.8 MFS_1,,1106.0,2.0,-9.11113567,-0.32797245399999997,True
CNAG_01258,GrfA protein    PF00560.25 LRR_1 PF00621.12 RhoGEF,,8866.0,16.0,-9.114067647,-0.328743622,True
CNAG_01675,tagatose-bisphosphate aldolase    PF01116.12 F_bP_aldolase,,556.0,1.0,-9.118941073,-0.33002543,True
CNAG_05096,histone deacetylase 3    PF00850.11 Hist_deacetyl,,2234.0,4.0,-9.12541347,-0.331727799,True
CNAG_07718,"PAN1 Part of actin cytoskeleton-regulatory complex Pan1p-Sla1p-End3p, associates with actin patches on the cell cortex; promotes protein-protein interactions essential for endocytosis; binds to and activates the Arp2/3 complex in vitro; previously thought to be a subunit of poly(A) ribonuclease","CIN1(Intersectin, C-terminal RhoGEF (DH)-PH domain)",560.0,1.0,-9.129283017,-0.332745566,True
CNAG_02791,conserved hypothetical protein,,1120.0,2.0,-9.129283017,-0.332745566,True
CNAG_01454,"STE12 Transcription factor that is activated by a MAP kinase signaling cascade, activates genes involved in mating or pseudohyphal/invasive growth pathways; cooperates with Tec1p transcription factor to regulate genes specific for invasive growth",STE12(STE-like transcription factor; encoded on MAT locus),1124.0,2.0,-9.13442632,-0.334098357,True
CNAG_06690,conserved hypothetical protein,,1688.0,3.0,-9.136136687999999,-0.334548218,True
CNAG_06062,predicted protein,,6193.0,11.0,-9.136991112,-0.334772948,True
CNAG_01131,conserved hypothetical protein,,565.0,1.0,-9.142107057,-0.336118543,True
CNAG_05173,MAG1 3-methyl-adenine DNA glycosylase; involved in protecting DNA against alkylating agents; initiates base excision repair by removing damaged bases to create abasic sites that are subsequently repaired; protein abundance increases in response to DNA replication stress,,567.0,1.0,-9.147204925,-0.337459384,True
CNAG_01541,conserved hypothetical protein,,5126.0,9.0,-9.153692762,-0.339165813,True
CNAG_01125,conserved hypothetical protein,,570.0,1.0,-9.154818108999999,-0.33946180200000003,True
CNAG_03194,saccharopine dehydrogenase,,572.0,1.0,-9.159871337,-0.34079090100000003,True
CNAG_02137,conserved hypothetical protein,,8614.0,15.0,-9.165577013,-0.34229160700000005,True
CNAG_02041,conserved hypothetical protein,,2880.0,5.0,-9.169925001000001,-0.343435214,True
CNAG_02655,conserved hypothetical protein    PF01436.13 NHL,,579.0,1.0,-9.177419537999999,-0.345406426,True
CNAG_01769,"AGC1 Mitochondrial amino acid transporter, acts both as a glutamate uniporter and as an aspartate-glutamate exchanger; involved in nitrogen metabolism and nitrogen compound biosynthesis",,1742.0,3.0,-9.181566408,-0.346497135,True
CNAG_05556,"RPL38 Ribosomal 60S subunit protein L38; homologous to mammalian ribosomal protein L38, no bacterial homolog",,2337.0,4.0,-9.190442018999999,-0.34883159700000005,True
CNAG_02479,monosaccharide transporter    PF00083.16 Sugar_tr PF07690.8 MFS_1,,586.0,1.0,-9.194756854,-0.34996648399999997,True
CNAG_02189,YJL216C putative alpha amylase,?(Alpha amylase found secreted/bound to cell wall),1760.0,3.0,-9.196397213,-0.350397931,True
CNAG_06968,hypothetical protein,,6456.0,11.0,-9.196993245,-0.35055469899999997,True
CNAG_07887,conserved hypothetical protein    PF00397.18 WW,,1180.0,2.0,-9.204571143999999,-0.35254783700000003,True
CNAG_05660,conserved hypothetical protein,,8881.0,15.0,-9.209615822,-0.353874687,True
CNAG_06560,esterase    PF07859.5 Abhydrolase_3,,9513.0,16.0,-9.215684663,-0.35547091299999994,True
CNAG_02896,"ERG13 3-hydroxy-3-methylglutaryl-CoA (HMG-CoA) synthase, catalyzes the formation of HMG-CoA from acetyl-CoA and acetoacetyl-CoA; involved in the second step in mevalonate biosynthesis",ERG130(Hydroxymethylglutaryl-CoA synthase),2974.0,5.0,-9.216260837,-0.355622458,True
CNAG_01713,conserved hypothetical protein,,597.0,1.0,-9.221587121,-0.357023376,True
CNAG_04353,conserved hypothetical protein    PF00096.18 zf-C2H2,?(CLR1 reserved gene name),1200.0,2.0,-9.22881869,-0.35892542200000005,True
CNAG_02223,YNR065C Protein of unknown function; protein-protein interactions suggest a possible role in actin patch formation; YNR065C is not an essential gene,,1204.0,2.0,-9.233619677,-0.36018817700000005,True
CNAG_02781,dihydrodipicolinate synthetase family protein    PF00701.14 DHDPS,,2412.0,4.0,-9.236014192,-0.36081798200000004,True
CNAG_00404,RING zinc finger protein    PF00097.17 zf-C3HC4 PF00628.21 PHD,,607.0,1.0,-9.245552706,-0.3633268,True
CNAG_03117,conserved hypothetical protein,,607.0,1.0,-9.245552706,-0.3633268,True
CNAG_03533,"JHD1 JmjC domain family histone demethylase specific for H3-K36, similar to proteins found in human, mouse, drosophila, X. laevis, C. elegans, and S. pombe",,611.0,1.0,-9.25502857,-0.36581914,True
CNAG_05396,LRP16 family protein    PF01661.13 Macro,,612.0,1.0,-9.257387843,-0.366439676,True
CNAG_02935,"YMR226C NADP(+)-dependent dehydrogenase; acts on serine, L-allo-threonine, and other 3-hydroxy acids; green fluorescent protein fusion protein localizes to the cytoplasm and nucleus; may interact with ribosomes, based on co-purification experiments",,1841.0,3.0,-9.261311411,-0.36747165200000004,True
CNAG_03344,conserved hypothetical protein,,3687.0,6.0,-9.2632692,-0.36798659,True
CNAG_03345,SSD1 Translational repressor with a role in polar growth and wall integrity; regulated by Cbk1p phosphorylation to effect bud-specific translational control and localization of specific mRNAs; interacts with TOR pathway components; contains a functional N-terminal nuclear localization sequence and nucleocytoplasmic shuttling appears to be critical to Ssd1p function,SSD1(Translational repressor; role in cell wall integrity),3687.0,6.0,-9.2632692,-0.36798659,True
CNAG_04158,HIRA(V) Histone chaperone,HIRA(Histone chaperone; mutant shows decreased lung infectivity in competitive STM infection and increased sensitivity to NO),1844.0,3.0,-9.26366044,-0.368089493,True
CNAG_05156,hypothetical protein    PF05730.3 CFEM,?(Protein found secreted/bound to cell wall),12314.0,20.0,-9.266083757999999,-0.368726874,True
CNAG_05558,FRK1 Protein kinase of unknown cellular role; similar to Kin4p; green fluorescent protein (GFP)-fusion protein localizes to the cytoplasm; interacts with rRNA transcription and ribosome biogenesis factors and the long chain fatty acyl-CoA synthetase Faa3,KIN4(Serine/threonine protein kinase),2477.0,4.0,-9.274378152999999,-0.370908465,True
CNAG_02063,conserved hypothetical protein,,3766.0,6.0,-9.293854784,-0.376031205,True
CNAG_03868,conserved hypothetical protein    PF07052.3 Hep_59,,1885.0,3.0,-9.295386307000001,-0.37643402600000003,True
CNAG_05802,D-aspartate oxidase    PF01266.16 DAO,"?(D-aspartate oxidase (aspartate to oxaloacetate), involved in degradation of NMDA (a neurotransmitter) as well)",1257.0,2.0,-9.295768934,-0.37653466399999996,True
CNAG_04447,chromosome 20 open reading frame 7    PF08241.4 Methyltransf_11 PF08242.4 Methyltransf_12,,1265.0,2.0,-9.30492167,-0.378942015,True
CNAG_07941,conserved hypothetical protein    PF04146.7 YTH,,8859.0,14.0,-9.30557322,-0.379113386,True
CNAG_01496,"PPT1 Protein serine/threonine phosphatase, regulates Hsp90 chaperone by affecting its ATPase and cochaperone binding activities; has similarity to human phosphatase PP5; present in both the nucleus and cytoplasm; expressed during logarithmic growth",,5069.0,8.0,-9.307485449,-0.37961634,True
CNAG_01047,conserved hypothetical protein,,634.0,1.0,-9.30833903,-0.379840849,True
CNAG_04677,xylitol dehydrogenase    PF00107.18 ADH_zinc_N PF08240.4 ADH_N,,635.0,1.0,-9.310612782,-0.380438891,True
CNAG_05803,"exo-beta-1,3-glucanase    PF08178.3 GnsAB",,3828.0,6.0,-9.317412614,-0.38222738100000003,True
CNAG_06433,AMP binding protein    PF00501.20 AMP-binding,,1281.0,2.0,-9.32305476,-0.383711378,True
CNAG_02719,predicted protein    PF00612.19 IQ,,3205.0,5.0,-9.324180547000001,-0.384007482,True
CNAG_07928,predicted protein,,1958.0,3.0,-9.350202549,-0.390851784,True
CNAG_07874,sugar transporter    PF00083.16 Sugar_tr PF07690.8 MFS_1,,3943.0,6.0,-9.360115494,-0.393459086,True
CNAG_04862,"GLT1 NAD(+)-dependent glutamate synthase (GOGAT), synthesizes glutamate from glutamine and alpha-ketoglutarate; with Gln1p, forms the secondary pathway for glutamate biosynthesis from ammonia; expression regulated by nitrogen source",,3306.0,5.0,-9.368942914,-0.395780872,True
CNAG_03336,YLR278C Zinc-cluster protein; GFP-fusion protein localizes to the nucleus; mutant shows moderate growth defect on caffeine; has a prion-domain like fragment that increases frequency of [URE3]; YLR278C is not an essential gene,,3978.0,6.0,-9.37286506,-0.39681247399999997,True
CNAG_05982,maltose porter    PF00083.16 Sugar_tr PF07690.8 MFS_1,,664.0,1.0,-9.375039431,-0.397384377,True
CNAG_04003,"PUF3 Protein of the mitochondrial outer surface, links the Arp2/3 complex with the mitochore during anterograde mitochondrial movement; also binds to and promotes degradation of mRNAs for select nuclear-encoded mitochondrial proteins",,672.0,1.0,-9.392317423,-0.40192883100000004,True
CNAG_00428,ICE2 Integral ER membrane protein with type-III transmembrane domains; required for maintenance of ER zinc homeostasis; necessary for efficient targeting of Trm1p tRNA methyltransferase to inner nuclear membrane; mutations cause defects in cortical ER morphology in both the mother and daughter cells,,2017.0,3.0,-9.393032867999999,-0.40211700799999994,True
CNAG_02562,acyl-Coenzyme A dehydrogenase    PF00441.16 Acyl-CoA_dh_1 PF02770.11 Acyl-CoA_dh_M PF02771.8 Acyl-CoA_dh_N PF08028.3 Acyl-CoA_dh_2,,682.0,1.0,-9.413627929,-0.407533917,True
CNAG_02164,conserved hypothetical protein    PF00569.9 ZZ PF03107.8 C1_2 PF07649.4 C1_3,,2047.0,3.0,-9.414332886,-0.407719335,True
CNAG_03503,ATP-binding cassette transporter protein YOR1    PF00005.19 ABC_tran PF00664.15 ABC_membrane,YOR1(ATP-binding cassette transporter),4110.0,6.0,-9.419960178,-0.409199424,True
CNAG_02865,hypothetical protein,,2752.0,4.0,-9.426264755,-0.410857653,True
CNAG_05572,conserved hypothetical protein    PF05347.7 Complex1_LYR,,691.0,1.0,-9.4325419,-0.41250866700000005,True
CNAG_05017,GabA permease,,11062.0,16.0,-9.433324627000001,-0.412714539,True
CNAG_04755,"BCK1 Mitogen-activated protein (MAP) kinase kinase kinase acting in the protein kinase C signaling pathway, which controls cell integrity; upon activation by Pkc1p phosphorylates downstream kinases Mkk1p and Mkk2p",BCK1(Mitogen-activated protein (MAP) kinase kinase kinase of the protein kinase C signaling pathway; controls cell integrity),1396.0,2.0,-9.447083226,-0.416333324,True
CNAG_07712,HST2 Cytoplasmic member of the silencing information regulator 2 (Sir2) family of NAD(+)-dependent protein deacetylases; modulates nucleolar (rDNA) and telomeric silencing; possesses NAD(+)-dependent histone deacetylase activity in vitro,,702.0,1.0,-9.45532722,-0.41850165799999994,True
CNAG_00369,MED6 Subunit of the RNA polymerase II mediator complex; associates with core polymerase subunits to form the RNA polymerase II holoenzyme; essential for transcriptional regulation; protein abundance increases in response to DNA replication stress,,705.0,1.0,-9.461479447,-0.42011981600000003,True
CNAG_07644,predicted protein,,3578.0,5.0,-9.483009577,-0.425782667,True
CNAG_04790,conserved hypothetical protein    PF00096.18 zf-C2H2,,2149.0,3.0,-9.484487267,-0.42617132799999996,True
CNAG_04653,conserved hypothetical protein,,1450.0,2.0,-9.501837185,-0.430734701,True
CNAG_06310,CAMK/CAMKL/BRSK protein kinase    PF00069.17 Pkinase,,727.0,1.0,-9.505811554,-0.431780039,True
CNAG_02693,conserved hypothetical protein    PF00153.19 Mito_carr,,2969.0,4.0,-9.535761378,-0.439657436,True
CNAG_00482,RPN10 Non-ATPase base subunit of the 19S regulatory particle (RP) of the 26S proteasome; N-terminus plays a role in maintaining the structural integrity of the RP; binds selectively to polyubiquitin chains; homolog of the mammalian S5a protein,,744.0,1.0,-9.539158811,-0.440551029,True
CNAG_06448,cystathionine gamma-lyase    PF01053.12 Cys_Met_Meta_PP,,35787.0,48.0,-9.542185488,-0.441347105,True
CNAG_04412,conserved hypothetical protein,,747.0,1.0,-9.544964432999999,-0.442078022,True
CNAG_01873,conserved hypothetical protein,,3018.0,4.0,-9.559377091,-0.445868837,True
CNAG_01874,conserved hypothetical protein    PF01124.10 MAPEG,,3018.0,4.0,-9.559377091,-0.445868837,True
CNAG_00546,CHS301 chitin synthase,CHS4(Chitin synthase with low expression in vegetative conditions)CHS4 (CHS6)(Putative chitin synthase; regulated by calcineurin via Crz1),3023.0,4.0,-9.561765264,-0.446496974,True
CNAG_05824,YPL247C Putative protein of unknown function; green fluorescent protein (GFP)-fusion protein localizes to the cytoplasm and nucleus; similar to the petunia WD repeat protein an11; overexpression causes a cell cycle delay or arrest,,756.0,1.0,-9.562242423999999,-0.446622477,True
CNAG_02598,chitinase    PF00704.20 Glyco_hydro_18,CHI21(Endochitinase),9842.0,13.0,-9.564296083,-0.44716263,True
CNAG_02686,"STR3 Peroxisomal cystathionine beta-lyase, converts cystathionine into homocysteine; may be redox regulated by Gto1p",,1515.0,2.0,-9.565102077999999,-0.44737462200000006,True
CNAG_01927,conserved hypothetical protein    PF00226.23 DnaJ,,2277.0,3.0,-9.567956075,-0.44812528,True
CNAG_05192,predicted protein,,1524.0,2.0,-9.573647187,-0.449622156,True
CNAG_04620,conserved hypothetical protein,,766.0,1.0,-9.581200582000001,-0.45160884799999995,True
CNAG_04314,UTR1 ATP-NADH kinase; phosphorylates both NAD and NADH; active as a hexamer; enhances the activity of ferric reductase (Fre1p),,767.0,1.0,-9.583082767999999,-0.45210390000000006,True
CNAG_06614,glycerophosphodiesterase    PF03009.9 GDPD,,1539.0,2.0,-9.587777516000001,-0.45333871200000003,True
CNAG_06097,conserved hypothetical protein    PF00172.10 Zn_clus,,776.0,1.0,-9.599912842,-0.456530544,True
CNAG_03866,"AVT1 Vacuolar transporter, imports large neutral amino acids into the vacuole; member of a family of seven S. cerevisiae genes (AVT1-7) related to vesicular GABA-glycine transporters",,786.0,1.0,-9.618385502,-0.46138922,True
CNAG_05261,conserved hypothetical protein,,786.0,1.0,-9.618385502,-0.46138922,True
CNAG_07507,"STE50 Protein involved in mating response, invasive/filamentous growth, and osmotolerance, acts as an adaptor that links G protein-associated Cdc42p-Ste20p complex to the effector Ste11p to modulate signal transduction","STE50(Adaptor protein, protein kinase regulator)",787.0,1.0,-9.620219826,-0.461871683,True
CNAG_03685,conserved hypothetical protein    PF00560.25 LRR_1,,789.0,1.0,-9.62388149,-0.462834773,True
CNAG_07470,high-affinity phosphodiesterase    PF00233.11 PDEase_I,PDE2(High-affinity phosphodiesterase),3206.0,4.0,-9.64655871,-0.468799332,True
CNAG_03597,conserved hypothetical protein    PF02714.7 DUF221,,804.0,1.0,-9.651051691000001,-0.469981075,True
CNAG_00839,"FMP41 Putative protein of unknown function; GFP-fusion protein is induced in response to the DNA-damaging agent MMS; the authentic, non-tagged protein is detected in highly purified mitochondria in high-throughput studies",,1608.0,2.0,-9.651051691000001,-0.469981075,True
CNAG_04807,conserved hypothetical protein    PF00172.10 Zn_clus,,815.0,1.0,-9.670656249,-0.475137463,True
CNAG_00506,conserved hypothetical protein,,829.0,1.0,-9.695228291,-0.481600397,True
CNAG_00597,"DIP5 Dicarboxylic amino acid permease, mediates high-affinity and high-capacity transport of L-glutamate and L-aspartate; also a transporter for Gln, Asn, Ser, Ala, and Gly",DIP5(Amino acid transporter)?(Possible proline permease),838.0,1.0,-9.710806434,-0.485697758,True
CNAG_02219,YLR247C02 zinc finger,,845.0,1.0,-9.722807531,-0.488854284,True
CNAG_06151,"YPD1 Phosphorelay intermediate protein, phosphorylated by the plasma membrane sensor Sln1p in response to osmotic stress and then in turn phosphorylates the response regulators Ssk1p in the cytosol and Skn7p in the nucleus",Ypd1(HPt protein involved in relaying signal in the stress response)YPD1(Histidine kinase; phosphorelay intermediate protein),846.0,1.0,-9.724513853,-0.48930308100000003,True
CNAG_01448,163.m06341p,?(protein of the MAT locus),4244.0,5.0,-9.729280846,-0.49055689399999997,True
CNAG_02682,MSH1 protein    PF00488.13 MutS_V PF01624.12 MutS_I PF05188.9 MutS_II PF05190.10 MutS_IV PF05192.10 MutS_III,,849.0,1.0,-9.729620744,-0.490646294,True
CNAG_02683,conserved hypothetical protein,,849.0,1.0,-9.729620744,-0.490646294,True
CNAG_03381,conserved hypothetical protein,,849.0,1.0,-9.729620744,-0.490646294,True
CNAG_01525,conserved hypothetical protein,,5953.0,7.0,-9.732046257,-0.49128425200000003,True
CNAG_03039,"DDI1 DNA damage-inducible v-SNARE binding protein with a role in suppression of protein secretion; may play a role in S-phase checkpoint control; has ubiquitin-associated (UBA), ubiquitin-like (UBL), and retroviral-like proteinase (RVP) domains",,2553.0,3.0,-9.733015322,-0.491539135,True
CNAG_06622,conserved hypothetical protein    PF03226.6 Yippee,,868.0,1.0,-9.761551232,-0.49904464600000004,True
CNAG_03492,conserved hypothetical protein,,875.0,1.0,-9.773139207,-0.502092513,True
CNAG_01384,bodown198    PF07690.8 MFS_1,,2642.0,3.0,-9.782452251,-0.5045420279999999,True
CNAG_07521,conserved hypothetical protein,,3553.0,4.0,-9.794821973,-0.507795511,True
CNAG_01251,"UFD4 Ubiquitin-protein ligase (E3) that interacts with Rpt4p and Rpt6p, two subunits of the 19S particle of the 26S proteasome; cytoplasmic E3 involved in the degradation of ubiquitin fusion proteins",UFD4(Ubiquitin-protein ligase),1783.0,2.0,-9.800090988,-0.509181366,True
CNAG_06867,conserved hypothetical protein,,914.0,1.0,-9.836050355,-0.518639393,True
CNAG_07802,"BIO3 7,8-diamino-pelargonic acid aminotransferase (DAPA), catalyzes the second step in the biotin biosynthesis pathway; BIO3 is in a cluster of 3 genes (BIO3, BIO4, and BIO5) that mediate biotin synthesis",,914.0,1.0,-9.836050355,-0.518639393,True
CNAG_02548,cobalamin synthesis protein    PF02492.11 cobW PF07683.6 CobW_C,,924.0,1.0,-9.851749041,-0.5227684579999999,True
CNAG_01543,APL6 Beta3-like subunit of the yeast AP-3 complex; functions in transport of alkaline phosphatase to the vacuole via the alternate pathway; exists in both cytosolic and peripherally associated membrane-bound pools,,925.0,1.0,-9.853309555,-0.523178905,True
CNAG_06240,"PDI1 Protein disulfide isomerase; multifunctional protein of ER lumen, essential for formation of disulfide bonds in secretory and cell-surface proteins, unscrambles non-native disulfide bonds; key regulator of Ero1p; forms complex with Mnl1p that has exomannosidase activity, processing unfolded protein-bound Man8GlcNAc2 oligosaccharides to Man7GlcNAc2, promoting degradation in unfolded protein response; PDI1 has a paralog, EUG1, that arose from the whole genome duplication",,926.0,1.0,-9.854868383,-0.523588907,True
CNAG_00890,conserved hypothetical protein,,928.0,1.0,-9.857980995,-0.524407586,True
CNAG_03928,APL2 Beta-adaptin subunit of the clathrin-associated protein (AP-1) complex; binds clathrin; involved in clathrin-dependent Golgi protein sorting; protein abundance increases in response to DNA replication stress,,933.0,1.0,-9.865733271,-0.526446588,True
CNAG_06925,ARR3 Plasma membrane metalloid/H+ antiporter; transports arsenite and antimonite; required for resistance to arsenic compounds; transcription is activated by Arr1p in the presence of arsenite,,2820.0,3.0,-9.876516947,-0.529282909,True
CNAG_02977,metal resistance protein ycf1    PF00005.19 ABC_tran PF00664.15 ABC_membrane,,2824.0,3.0,-9.878561872999999,-0.529820765,True
CNAG_05352,YBR220C Putative protein of unknown function; YBR220C is not an essential gene,,959.0,1.0,-9.905387005,-0.536876307,True
CNAG_01257,GCY1 Putative NADP(+) coupled glycerol dehydrogenase; proposed to be involved in an alternative pathway for glycerol catabolism; also has mRNA binding activity; member of the aldo-keto reductase (AKR) family; protein abundance increases in response to DNA replication stress,,962.0,1.0,-9.909893084,-0.538061495,True
CNAG_01671,acetyl/propionyl CoA carboxylase    PF01039.14 Carboxyl_trans,,970.0,1.0,-9.921840937,-0.541204017,True
CNAG_01564,NOP12 Nucleolar protein involved in pre-25S rRNA processing and biogenesis of large 60S ribosomal subunit; contains an RNA recognition motif (RRM); binds to Ebp2; similar to Nop13p and Nsr1p,,976.0,1.0,-9.930737338,-0.5435439470000001,True
CNAG_03494,conserved hypothetical protein    PF02037.19 SAP,,982.0,1.0,-9.939579214,-0.545869536,True
CNAG_06431,acyl-CoA oxidase    PF00441.16 Acyl-CoA_dh_1 PF02770.11 Acyl-CoA_dh_M PF02771.8 Acyl-CoA_dh_N PF08028.3 Acyl-CoA_dh_2,,994.0,1.0,-9.957102042,-0.5504783870000001,True
CNAG_00642,conserved hypothetical protein,,3000.0,3.0,-9.965784285,-0.552761989,True
CNAG_06821,ferric reductase transmembrane component 4    PF01794.11 Ferric_reduct PF08022.4 FAD_binding_8 PF08030.4 NAD_binding_6,FRE2(Ferric reductase transmembrane component),1002.0,1.0,-9.968666792999999,-0.553520146,True
CNAG_06104,conserved hypothetical protein,,3015.0,3.0,-9.972979786,-0.554654549,True
CNAG_03308,"AXL2 Integral plasma membrane protein required for axial budding in haploid cells, localizes to the incipient bud site and bud neck; glycosylated by Pmt4p; potential Cdc28p substrate",,1006.0,1.0,-9.97441459,-0.55503193,True
CNAG_01905,KSP1(iV) Protein kinase,KSP1(Predicted serine/threonine protein kinase; mutant shows increased infectivity in competitive STM infection),4027.0,4.0,-9.975489757,-0.555314721,True
CNAG_00121,"GPD2 NAD-dependent glycerol 3-phosphate dehydrogenase, homolog of Gpd1p, expression is controlled by an oxygen-independent signaling pathway required to regulate metabolism under anoxic conditions; located in cytosol and mitochondria",,3056.0,3.0,-9.992466327,-0.559779895,True
CNAG_07724,ligand-regulated transcription factor    PF00649.10 Copper-fist PF07473.3 Toxin_11,Cuf1(I think this is the right CNAG--copper transcription factor whose knockout has a phagocytosis defect because of the copper and iron connection)CUF1(Putative copper-sensing transcription factor involved in regulation of copper transport and copper homeostasis; localized to the nucleus in copper-limiting conditions),2053.0,2.0,-10.00351791,-0.562686681,True
CNAG_06417,"APS2 Small subunit of the clathrin-associated adaptor complex AP-2, which is involved in protein sorting at the plasma membrane; related to the sigma subunit of the mammalian plasma membrane clathrin-associated protein (AP-2) complex",,2072.0,2.0,-10.01680829,-0.566182314,True
CNAG_06419,conserved hypothetical protein,,2073.0,2.0,-10.017504400000002,-0.566365405,True
CNAG_01937,predicted protein,,1047.0,1.0,-10.03204573,-0.570190062,True
CNAG_00832,D-hydroxyacid dehydrogenase    PF00389.22 2-Hacid_dh PF02826.11 2-Hacid_dh_C,,4302.0,4.0,-10.07079181,-0.58038105,True
CNAG_06170,"YJL068C Non-essential intracellular esterase that can function as an S-formylglutathione hydrolase; may be involved in the detoxification of formaldehyde, which can be metabolized to S-formylglutathione; similar to human esterase D",,1089.0,1.0,-10.08878824,-0.585114468,True
CNAG_06804,BSP3    PF00651.23 BTB,BSP3(BTP/PZ domain protein; encoded on MAT locus),1114.0,1.0,-10.12153352,-0.593727126,True
CNAG_05939,conserved hypothetical protein,,1133.0,1.0,-10.14593215,-0.600144449,True
CNAG_04210,"MPH3 Alpha-glucoside permease, transports maltose, maltotriose, alpha-methylglucoside, and turanose; identical to Mph2p; encoded in a subtelomeric position in a region likely to have undergone duplication",,1138.0,1.0,-10.15228484,-0.601815334,True
CNAG_05685,neutral amino acid transporter,,1168.0,1.0,-10.18982456,-0.611689024,True
CNAG_04632,"DAL4 Allantoin permease; expression sensitive to nitrogen catabolite repression and induced by allophanate, an intermediate in allantoin degradation",,5842.0,5.0,-10.19031855,-0.611818953,True
CNAG_01446,hypothetical protein    PF04119.4 HSP9_HSP12,"HSP12(Heat shock protein, 12kDa)",3531.0,3.0,-10.20089861,-0.614601718,True
CNAG_01432,"RSA4 WD-repeat protein involved in ribosome biogenesis; may interact with ribosomes; required for maturation and efficient intra-nuclear transport or pre-60S ribosomal subunits, localizes to the nucleolus",,1194.0,1.0,-10.22158712,-0.620043208,True
CNAG_04277,SYG1 Plasma membrane protein of unknown function; truncation and overexpression suppresses lethality of G-alpha protein deficiency,,1194.0,1.0,-10.22158712,-0.620043208,True
CNAG_00982,conserved hypothetical protein    PF00076.14 RRM_1,,1202.0,1.0,-10.23122118,-0.622577157,True
CNAG_03769,"HXK2 Hexokinase isoenzyme 2; catalyzes phosphorylation of glucose in the cytosol; predominant hexokinase during growth on glucose; functions in the nucleus to repress expression of HXK1 and GLK1 and to induce expression of its own gene; phosphorylation/dephosphorylation at serine-14 by protein kinase Snf1p and protein phosphatase Glc7p-Reg1p regulates nucleocytoplasmic shuttling of Hxk2p; HXK2 has a paralog, HXK1, that arose from the whole genome duplication",HXK2(Hexokinase; predicted peroxisome targeting signal (type 2) motif),1216.0,1.0,-10.24792751,-0.626971253,True
CNAG_04887,conserved hypothetical protein,,1246.0,1.0,-10.28308835,-0.6362192520000001,True
CNAG_00837,"ZRG17 Endoplasmic reticulum protein of unknown function, transcription is induced under conditions of zinc deficiency; mutant phenotype suggests a role in uptake of zinc",,1282.0,1.0,-10.32418055,-0.6470273129999999,True
CNAG_01973,C2H2 zinc finger protein Zas1A    PF00096.18 zf-C2H2 PF04082.10 Fungal_trans,,1322.0,1.0,-10.36850646,-0.6586859079999999,True
CNAG_01690,MFS transporter    PF07690.8 MFS_1,,2667.0,2.0,-10.38100211,-0.661972511,True
CNAG_00564,conserved hypothetical protein,? (Potential velvet in crypto),1362.0,1.0,-10.41151099,-0.669996951,True
CNAG_05915,hypothetical protein,,1404.0,1.0,-10.45532722,-0.6815214890000001,True
CNAG_06887,"VMA21 Integral membrane protein that is required for vacuolar H+-ATPase (V-ATPase) function, although not an actual component of the V-ATPase complex; functions in the assembly of the V-ATPase; localized to the yeast endoplasmic reticulum (ER)",,1431.0,1.0,-10.48280796,-0.6887494679999999,True
CNAG_03870,delta 8-sphingolipid desaturase    PF00173.20 Cyt-b5 PF00487.16 FA_desaturase,,1456.0,1.0,-10.50779464,-0.6953214609999999,True
CNAG_04523,glyceraldehyde 3-phosphate dehydrogenase    PF00044.16 Gp_dh_N PF02800.12 Gp_dh_C,,1471.0,1.0,-10.52258153,-0.699210707,True
CNAG_06888,cytoplasmic protein    PF00400.24 WD40,,1473.0,1.0,-10.52454172,-0.6997262740000001,True
CNAG_03572,"MRH1 Protein that localizes primarily to the plasma membrane, also found at the nuclear envelope; the authentic, non-tagged protein is detected in mitochondria in a phosphorylated state; has similarity to Hsp30p and Yro2p",,2964.0,2.0,-10.53332973,-0.7020376970000001,True
CNAG_04524,zinc metalloprotease    PF00200.15 Disintegrin,,1509.0,1.0,-10.55937709,-0.708888669,True
CNAG_06404,conserved hypothetical protein,,3046.0,2.0,-10.57270023,-0.7123929179999999,True
CNAG_07824,conserved hypothetical protein    PF00400.24 WD40,,1534.0,1.0,-10.58308277,-0.715123732,True
CNAG_05515,conserved hypothetical protein,,1716.0,1.0,-10.74483384,-0.757667471,True
CNAG_01185,"SIL1 Nucleotide exchange factor for the endoplasmic reticulum (ER) lumenal Hsp70 chaperone Kar2p, required for protein translocation into the ER; homolog of Yarrowia lipolytica SLS1; GrpE-like protein",,1799.0,1.0,-10.81297947,-0.7755911240000001,True
CNAG_05245,conserved hypothetical protein,,1848.0,1.0,-10.85174904,-0.78578829,True
CNAG_05302,amine oxidase,,1850.0,1.0,-10.85330956,-0.7861987359999999,True
CNAG_06010,"HFD1 Hexadecenal dehydrogenase; involved in the conversion of sphingosine 1-phosphate breakdown product hexadecenal to hexadecenoic acid; located in the mitochondrial outer membrane and also in lipid particles; has similarity to ALDH3A2, a human fatty aldehyde dehydrogenase (FALDH) mutated in Sjogren-Larsson syndrome, a neurocutaneous disorder",,5710.0,3.0,-10.89431253,-0.796983332,True
CNAG_05223,conserved hypothetical protein    PF00515.20 TPR_1 PF07719.9 TPR_2,,1914.0,1.0,-10.90237511,-0.799103951,True
CNAG_05255,conserved hypothetical protein    PF00172.10 Zn_clus PF04082.10 Fungal_trans,,1973.0,1.0,-10.94617524,-0.810624253,True
CNAG_03415,conserved hypothetical protein,,7894.0,4.0,-10.946540800000001,-0.8107204029999999,True
CNAG_06209,hypothetical protein,,2033.0,1.0,-10.989394500000001,-0.821991775,True
CNAG_00484,puruvate dehydrogenase complex    PF00364.14 Biotin_lipoyl PF02817.9 E3_binding,,2408.0,1.0,-11.23361968,-0.88622784,True
CNAG_02324,conserved hypothetical protein,,2444.0,1.0,-11.25502857,-0.8918588040000001,True
CNAG_05254,"HUT1 Protein with a role in UDP-galactose transport to the Golgi lumen, has similarity to human UDP-galactose transporter UGTrel1, exhibits a genetic interaction with S. cerevisiae ERO1",,3900.0,1.0,-11.92925841,-1.069194622,True
CNAG_01416,YOR021C SPOUT methyltransferase; catalyzes omega-monomethylation of Rps3p on Arg-146; not an essential gene; predicted to be involved in rRNA processing and ribosome biogenesis and in biopolymer catabolism,,75.0,26207.0,8.448845902,4.290650942,False
CNAG_02284,branched-chain alpha-keto acid dehydrogenase E1-alpha subunit    PF00676.12 E1_dh,,1.0,281.0,8.13442632,4.207952357,False
CNAG_04234,conserved hypothetical protein,,3.0,678.0,7.820178962000001,4.12529907,False
CNAG_06490,CAMK/CAMKL protein kinase    PF00069.17 Pkinase,,4.0,697.0,7.445014846,4.026623467,False
CNAG_04141,vacuolar protein    PF01546.20 Peptidase_M20 PF07687.6 M20_dimer,,3.0,511.0,7.41221698,4.017996978,False
CNAG_00717,"CUE5 Protein containing a CUE domain that binds ubiquitin, which may facilitate intramolecular monoubiquitination; green fluorescent protein (GFP)-fusion protein localizes to the cytoplasm in a punctate pattern",,60.0,10027.0,7.384711811,4.010762573,False
CNAG_04237,conserved hypothetical protein    PF03992.8 ABM,,2.0,226.0,6.820178962000001,3.862279238,False
CNAG_06188,conserved hypothetical protein    PF00172.10 Zn_clus PF05001.5 RNA_pol_Rpb1_R,?(Zn2-Cys6 zinc-finger transcription factor; Gat201-regulated),15.0,873.0,5.862947247999999,3.6105083139999996,False
CNAG_03395,"NFU1 Protein involved in iron metabolism in mitochondria; similar to NifU, which is a protein required for the maturation of the Fe/S clusters of nitrogenase in nitrogen-fixing bacteria",,77.0,3631.0,5.559364673999999,3.530660076,False
CNAG_02199,conserved hypothetical protein    PF04488.7 Gly_transf_sug,,6.0,246.0,5.357552005,3.477579342,False
CNAG_04103,DUF895 domain membrane protein    PF07690.8 MFS_1,,33.0,507.0,3.9414478180000003,3.105115857,False
CNAG_04042,conserved hypothetical protein,,2.0,28.0,3.807354922,3.0698467660000004,False
CNAG_01730,STE/STE7/MEK1 protein kinase    PF00069.17 Pkinase PF07714.9 Pkinase_Tyr,STE7(MAP kinase kinase; role in pheromone mating response),8.0,104.0,3.700439718,3.0417259469999998,False
CNAG_06167,"BSD2 Heavy metal ion homeostasis protein, facilitates trafficking of Smf1p and Smf2p metal transporters to the vacuole where they are degraded, controls metal ion transport, prevents metal hyperaccumulation, functions in copper detoxification",,6.0,33.0,2.459431619,2.7153162060000002,False
CNAG_01163,RAD54(V) SWI/SNF family ATPase that promotes recombinational DNA repair,RAD54(SWI/SNF family ATPase; predicted role in recombinational DNA repair; mutant shows decreased lung infectivity in competitive STM infection and increased sensitivity to NO),12.0,50.0,2.058893689,2.609966787,False
CNAG_06064,conserved hypothetical protein    PF00102.19 Y_phosphatase,,58.0,209.0,1.849378137,2.554860042,False
CNAG_06786,conserved hypothetical protein,,60.0,109.0,0.861293729,2.294974247,False
CNAG_05231,"PSY2 Subunit of protein phosphatase PP4 complex; active complex is composed of catalytic subunit Pph3p and Psy2p, with Psy4p apparently providing additional substrate specificity in some cases; regulates recovery from the DNA damage checkpoint and also the gene conversion- and single-strand annealing-mediated pathways of meiotic double-strand break repair; Pph3p and Psy2p localize to foci on meiotic chromosomes; putative homolog of mammalian R3",,32.0,18.0,-0.830074999,1.850110729,False
CNAG_07534,TRS130 One of 10 subunits of the transport protein particle (TRAPP) complex of the cis-Golgi which mediates vesicle docking and fusion; involved in ER to Golgi membrane traffic; mutation activates transcription of OCH1,,73.0,39.0,-0.90442234,1.8305559040000001,False
CNAG_07377,"TRA1 Subunit of SAGA and NuA4 histone acetyltransferase complexes; interacts with acidic activators (e.g., Gal4p) which leads to transcription activation; similar to human TRRAP, which is a cofactor for c-Myc mediated oncogenic transformation",TRA1(Predicted SAGA histone acetyltransferase complex component),73.0,36.0,-1.019899557,1.800183106,False
CNAG_00691,conserved hypothetical protein,,52.0,10.0,-2.378511623,1.4428411890000001,False
CNAG_05066,conserved hypothetical protein,,24.0,4.0,-2.584962501,1.388540514,False
CNAG_04046,YLR065C Protein proposed to be involved in vacuolar functions; mutant shows defect in CPY processing; YLR065C is not an essential gene,,90.0,15.0,-2.584962501,1.388540514,False
CNAG_00541,"FMO1 Flavin-containing monooxygenase, localized to the cytoplasmic face of the ER membrane; catalyzes oxidation of biological thiols to maintain the ER redox buffer ratio for correct folding of disulfide-bonded proteins",,57.0,6.0,-3.247927513,1.214167568,False
CNAG_06355,conserved hypothetical protein,,87.0,9.0,-3.2730184939999996,1.207568142,False
CNAG_03632,conserved hypothetical protein,,95.0,9.0,-3.399930607,1.17418774,False
CNAG_04205,conserved hypothetical protein    PF00439.17 Bromodomain,,49.0,4.0,-3.6147098439999996,1.117696541,False
CNAG_05517,conserved hypothetical protein    PF07690.8 MFS_1,,26.0,2.0,-3.700439718,1.095147884,False
CNAG_06578,conserved hypothetical protein,,33.0,2.0,-4.044394119,1.004681055,False
CNAG_07675,"IRA2 GTPase-activating protein that negatively regulates RAS by converting it from the GTP- to the GDP-bound inactive form, required for reducing cAMP levels under nutrient limiting conditions, has similarity to Ira1p and human neurofibromin",,58.0,3.0,-4.273018494,0.9445483109999999,False
CNAG_05445,"SHE4 Protein containing a UCS (UNC-45/CRO1/SHE4) domain, binds to myosin motor domains to regulate myosin function; involved in endocytosis, polarization of the actin cytoskeleton, and asymmetric mRNA localization",,59.0,3.0,-4.297680549,0.938061701,False
CNAG_01155,"GUT1 Glycerol kinase, converts glycerol to glycerol-3-phosphate; glucose repression of expression is mediated by Adr1p and Ino2p-Ino4p; derepression of expression on non-fermentable carbon sources is mediated by Opi1p and Rsf1p",,21.0,1.0,-4.392317423,0.913170327,False
CNAG_01338,"RAD4 Protein that recognizes and binds damaged DNA (with Rad23p) during nucleotide excision repair; subunit of Nuclear Excision Repair Factor 2 (NEF2); also involved, with Rad23p, in turnover of ubiquitylated proteins",,63.0,3.0,-4.392317423,0.913170327,False
CNAG_05940,conserved hypothetical protein    PF00096.18 zf-C2H2,,22.0,1.0,-4.459431619,0.895517962,False
CNAG_01595,conserved hypothetical protein,,25.0,1.0,-4.64385619,0.847010643,False
CNAG_03022,GTR2 Putative GTP binding protein that negatively regulates Ran/Tc4 GTPase cycle; activates transcription; subunit of EGO and GSE complexes; required for sorting of Gap1p; localizes to cytoplasm and to chromatin; homolog of human RagC and RagD,,25.0,1.0,-4.64385619,0.847010643,False
CNAG_06030,conserved hypothetical protein,,76.0,3.0,-4.662965013,0.841984643,False
CNAG_05590,CnHHK3    PF00072.16 Response_reg PF00512.17 HisKA PF02518.18 HATPase_c PF08447.3 PAS_3 PF08448.2 PAS_4,Tco2(Sensor kinase mediating stress response)TCO2(Two-component-like sensor kinase),52.0,2.0,-4.700439718,0.8321280520000001,False
CNAG_00996,"PMT4 Protein O-mannosyltransferase, transfers mannose residues from dolichyl phosphate-D-mannose to protein serine/threonine residues; appears to form homodimers in vivo and does not complex with other Pmt proteins; target for new antifungals","PMT4(O-mannosyltransferase; role in capsule production, cell growth and morphology, cell wall integrity, and virulence)",27.0,1.0,-4.754887502,0.817807205,False
CNAG_02254,quinate permease    PF00083.16 Sugar_tr PF07690.8 MFS_1,,56.0,2.0,-4.807354922,0.804007233,False
CNAG_04833,conserved hypothetical protein,,29.0,1.0,-4.857980995,0.7906915720000001,False
CNAG_00678,urease accessory protein ureG    PF02492.11 cobW,,31.0,1.0,-4.95419631,0.765385036,False
CNAG_05289,conserved hypothetical protein,,31.0,1.0,-4.95419631,0.765385036,False
CNAG_01520,protein-arginine N-methyltransferase,,33.0,1.0,-5.044394119,0.741661224,False
CNAG_07522,conserved hypothetical protein,,35.0,1.0,-5.129283017,0.71933376,False
CNAG_06833,predicted protein,,37.0,1.0,-5.209453366,0.6982473690000001,False
CNAG_03138,CUL3(V) Cullin subunit of SCF-like ubiquitin ligase,CUL3(Cullin subunit of SCF-like ubiquitin ligase; mutant shows decreased lung infectivity in competitive STM infection),75.0,2.0,-5.22881869,0.6931539040000001,False
CNAG_03382,conserved hypothetical protein,,76.0,2.0,-5.2479275130000005,0.688127905,False
CNAG_06628,aldehyde dehydrogenase    PF00171.14 Aldedh,?(Aldehyde dehydrogenase),77.0,2.0,-5.266786541,0.683167607,False
CNAG_01880,conserved hypothetical protein,,40.0,1.0,-5.321928095,0.668664284,False
CNAG_01744,"RHR2 Constitutively expressed isoform of DL-glycerol-3-phosphatase; involved in glycerol biosynthesis, induced in response to both anaerobic and, along with the Hor2p/Gpp2p isoform, osmotic stress",,80.0,2.0,-5.321928095,0.668664284,False
CNAG_05366,"YGR054W Eukaryotic initiation factor (eIF) 2A; associates specifically with both 40S subunits and 80 S ribosomes, and interacts genetically with both eIF5b and eIF4E; homologous to mammalian eIF2A",,41.0,1.0,-5.357552005,0.659294489,False
CNAG_01360,"PUF2 Member of the PUF protein family, which is defined by the presence of Pumilio homology domains that confer RNA binding activity; preferentially binds mRNAs encoding membrane-associated proteins",,42.0,1.0,-5.392317423,0.650150495,False
CNAG_06983,conserved hypothetical protein    PF02809.12 UIM,,42.0,1.0,-5.392317423,0.650150495,False
CNAG_07744,"PIK1 Phosphatidylinositol 4-kinase; catalyzes first step in the biosynthesis of phosphatidylinositol-4,5-biphosphate; may control cytokinesis through the actin cytoskeleton",PIK1(1-phosphatidylinositol 4-kinase),42.0,1.0,-5.392317423,0.650150495,False
CNAG_05536,conserved hypothetical protein    PF08110.4 Antimicrobial15,,43.0,1.0,-5.426264755,0.641221674,False
CNAG_07641,monosaccharide transporter    PF00083.16 Sugar_tr PF07690.8 MFS_1,,43.0,1.0,-5.426264755,0.641221674,False
CNAG_00711,conserved hypothetical protein    PF04248.4 DUF427,,87.0,2.0,-5.442943496,0.636834834,False
CNAG_00623,cytoplasmic protein,,45.0,1.0,-5.491853096,0.6239706389999999,False
CNAG_00465,conserved hypothetical protein,,91.0,2.0,-5.50779464,0.6197776970000001,False
CNAG_07758,conserved hypothetical protein    PF08631.2 SPO22,,98.0,2.0,-5.614709844,0.591656878,False
CNAG_03993,BIM1 Microtubule-binding protein that together with Kar9p makes up the cortical microtubule capture site and delays the exit from mitosis when the spindle is oriented abnormally,BIM1(Microtubule binding protein),53.0,1.0,-5.727920455,0.5618802420000001,False
CNAG_06497,microsomal epoxide hydrolase    PF06441.4 EHN,,53.0,1.0,-5.727920455,0.5618802420000001,False
CNAG_02747,chaperone protein DNAJ    PF00226.23 DnaJ,,54.0,1.0,-5.754887502000001,0.554787374,False
CNAG_00736,exocyst protein,,55.0,1.0,-5.781359714,0.547824657,False
CNAG_05466,predicted protein,,55.0,1.0,-5.781359714,0.547824657,False
CNAG_03914,prib protein    PF04082.10 Fungal_trans,,56.0,1.0,-5.807354922000001,0.5409874020000001,False
CNAG_02038,conserved hypothetical protein    PF00226.23 DnaJ,,57.0,1.0,-5.832890014,0.534271166,False
CNAG_00601,glycosyl hydrolase    PF03443.6 Glyco_hydro_61,,65.0,1.0,-6.022367813,0.48443474700000005,False
CNAG_02604,HOP1 Meiosis-specific DNA binding protein that displays Red1p dependent localization to the unsynapsed axial-lateral elements of the synaptonemal complex; required for homologous chromosome synapsis and chiasma formation,,69.0,1.0,-6.108524457000001,0.46177384200000005,False
CNAG_00744,"HOC1 Alpha-1,6-mannosyltransferase involved in cell wall mannan biosynthesis; subunit of a Golgi-localized complex that also contains Anp1p, Mnn9p, Mnn11p, and Mnn10p; identified as a suppressor of a cell lysis sensitive pkc1-371 allele","OCH1(Alpha 1,6-mannosyltransferase)",70.0,1.0,-6.1292830170000006,0.456313929,False
CNAG_03959,conserved hypothetical protein,,70.0,1.0,-6.1292830170000006,0.456313929,False
CNAG_00140,SNP1 Component of U1 snRNP required for mRNA splicing via spliceosome; substrate of the arginine methyltransferase Hmt1p; may interact with poly(A) polymerase to regulate polyadenylation; homolog of human U1 70K protein; protein abundance increases in response to DNA replication stress,,71.0,1.0,-6.14974712,0.450931464,False
CNAG_05528,conserved hypothetical protein,,74.0,1.0,-6.209453366,0.43522753700000005,False
CNAG_00347,"YLR419W Putative helicase with limited sequence similarity to human Rb protein; the authentic, non-tagged protein is detected in highly purified mitochondria in high-throughput studies; YLR419W is not an essential gene",,75.0,1.0,-6.22881869,0.43013407200000003,False
CNAG_01266,"PIM1 ATP-dependent Lon protease, involved in degradation of misfolded proteins in mitochondria; required for biogenesis and maintenance of mitochondria",,76.0,1.0,-6.247927513,0.425108073,False
CNAG_03383,TAN1 Putative tRNA acetyltransferase; RNA-binding protein required for the formation of the modified nucleoside N(4)-acetylcytidine in serine and leucine tRNAs but not required for the same modification in 18S rRNA; protein abundance increases in response to DNA replication stress,,76.0,1.0,-6.247927513,0.425108073,False
CNAG_05898,"MET8 Bifunctional dehydrogenase and ferrochelatase, involved in the biosynthesis of siroheme, a prosthetic group used by sulfite reductase; required for sulfate assimilation and methionine biosynthesis",,81.0,1.0,-6.339850003,0.400930635,False
CNAG_03984,"YCH1 Phosphatase with sequence similarity to Cdc25p, Arr2p and Mih1p; member of the single-domain rhodanese homology superfamily; green fluorescent protein (GFP)-fusion protein localizes to both the cytoplasm and the nucleus",,88.0,1.0,-6.459431619,0.369478299,False
CNAG_00128,conserved hypothetical protein,,90.0,1.0,-6.491853096,0.36095080700000004,False
CNAG_02549,conserved hypothetical protein,,91.0,1.0,-6.50779464,0.356757865,False
CNAG_04243,"CDC24 Guanine nucleotide exchange factor (GEF or GDP-release factor) for Cdc42p; required for polarity establishment and maintenance, and mutants have morphological defects in bud formation and shmooing","cnCDC24(named because it is homologous to CDC24 in cerevisiae? (guanine nucleotide exchange factor, required for polarity establishment and maintenance, mutants have morphological defects in bud formation and shmooing))CDC24(Guanine nucleotide exchange factor (GEF) for Cdc42)",92.0,1.0,-6.523561956,0.352610748,False
CNAG_01293,conserved hypothetical protein    PF02985.14 HEAT,,95.0,1.0,-6.569855607999999,0.3404346,False
CNAG_01208,"CCH1 Voltage-gated high-affinity calcium channel involved in calcium influx in response to some environmental stresses as well as exposure to mating pheromones; interacts and co-localizes with Mid1p, suggesting Cch1p and Mid1p function together",CCH1(Ca(2+)-permeable channel; mediates calcium entry; required for calcium uptake in low-calcium; role in virulence),96.0,1.0,-6.584962501000001,0.33646118700000005,False
CNAG_06381,DUF221 family protein    PF02714.7 DUF221,,100.0,1.0,-6.64385619,0.320970979,False
